# Supplementary material for: Insight Into the Long Noncoding RNA and mRNA Coexpression Profile in the Human Blood Transcriptome Upon Leishmania infantum Infection
Source: PubMed Central journal article supplement (PMC8965071; doi:10.3389/fimmu.2022.784463), 2022-03-15
Supplement: Presentation_1.pdf [file Presentation_1.pdf]

Code

- [Show All Code](#)
- [Hide All Code](#)

# CEMiTool

Report

Modules

Profile Plot

# M1

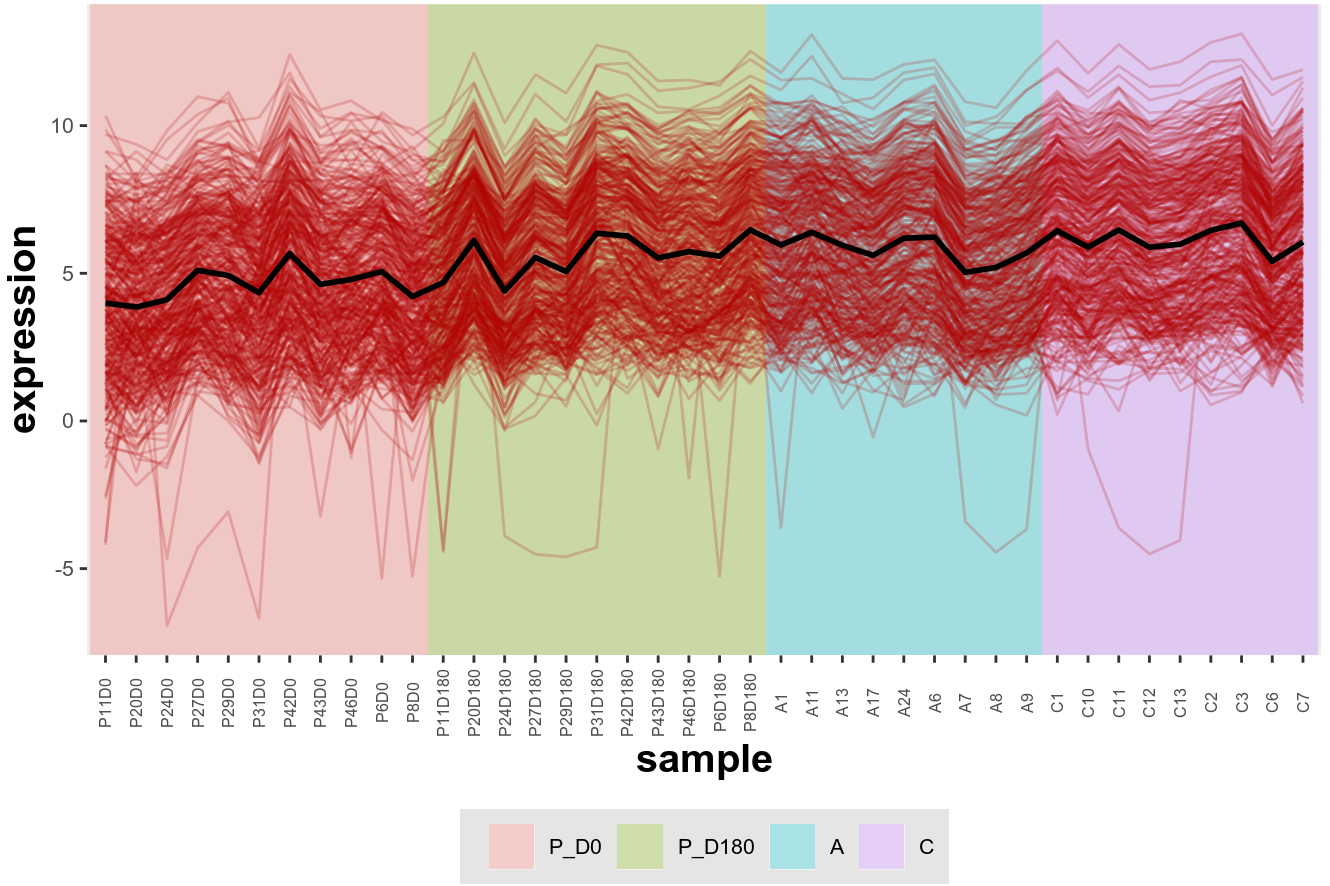

# M2

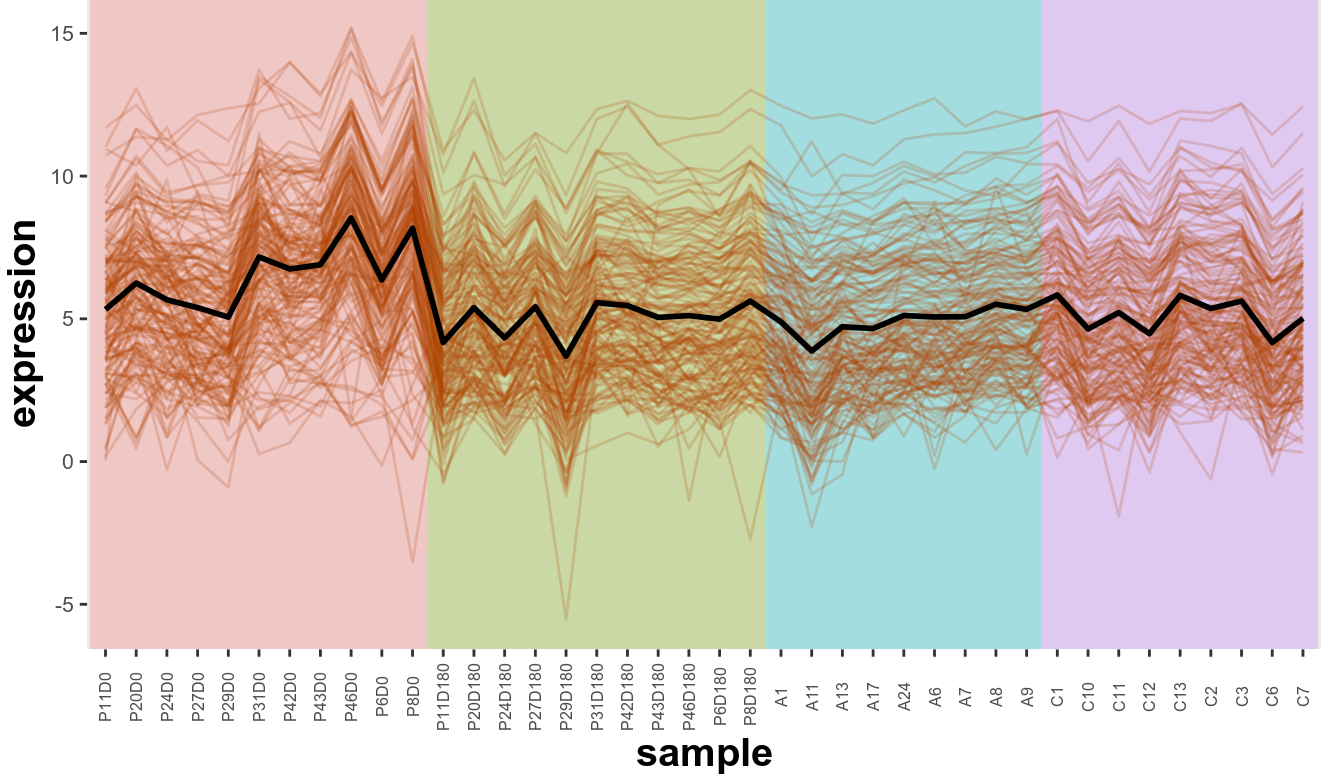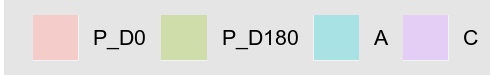

# M3

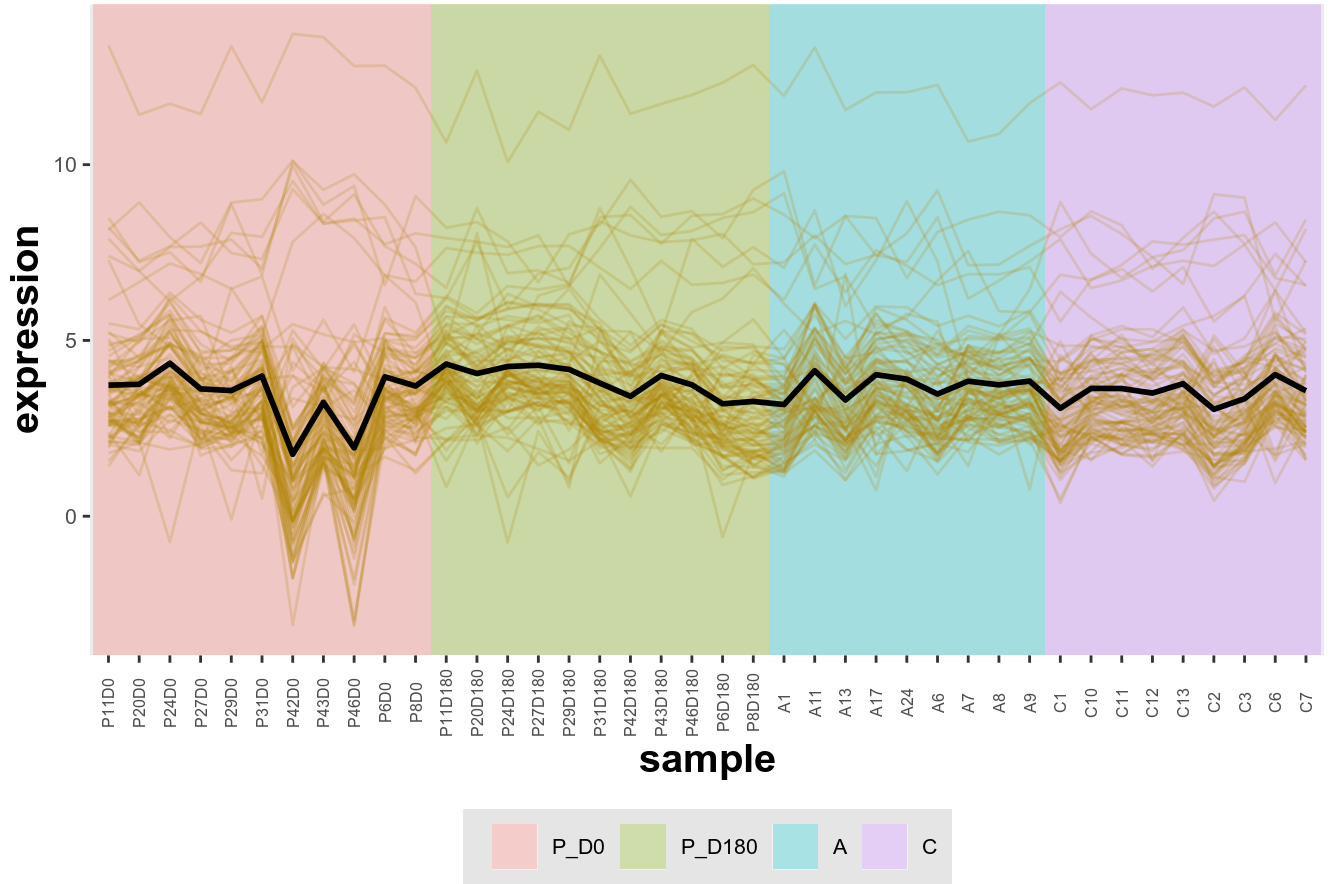

# M4

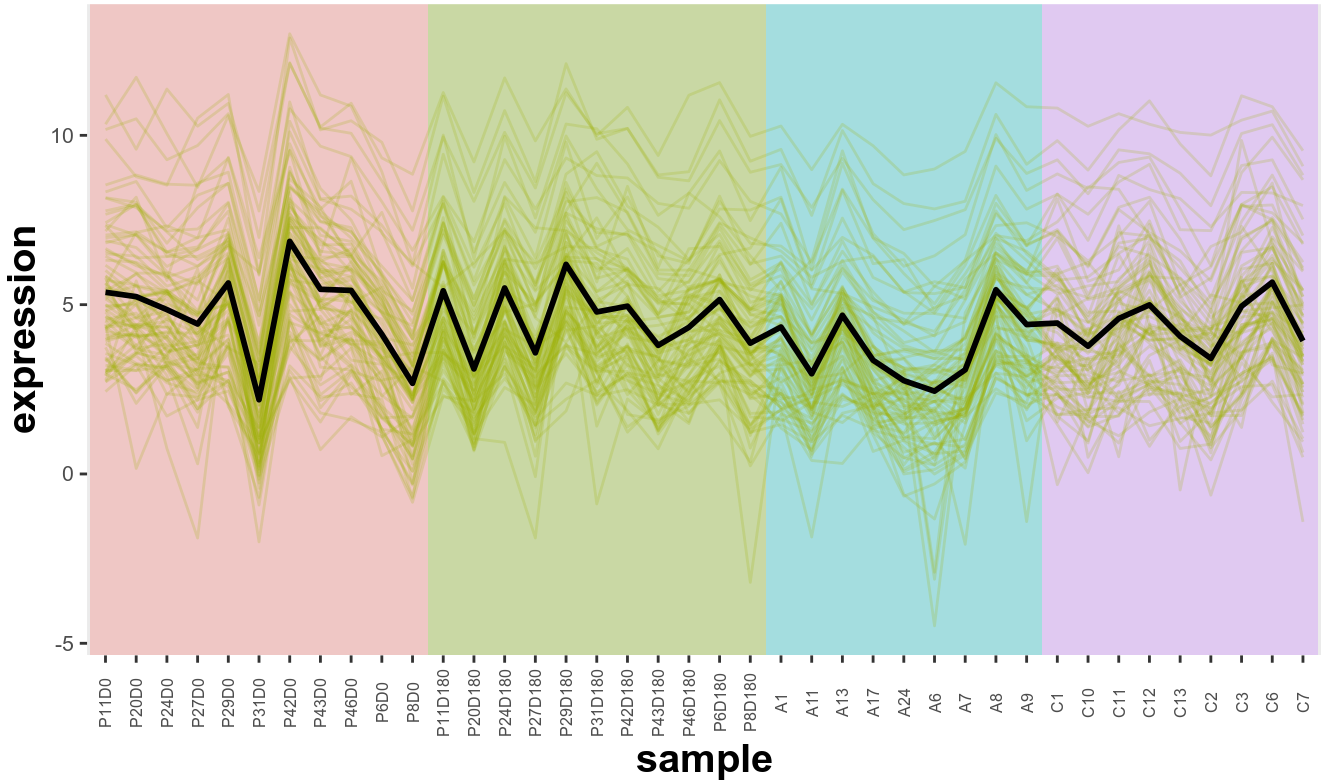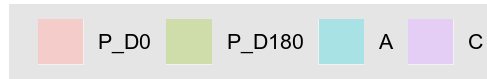

# M5

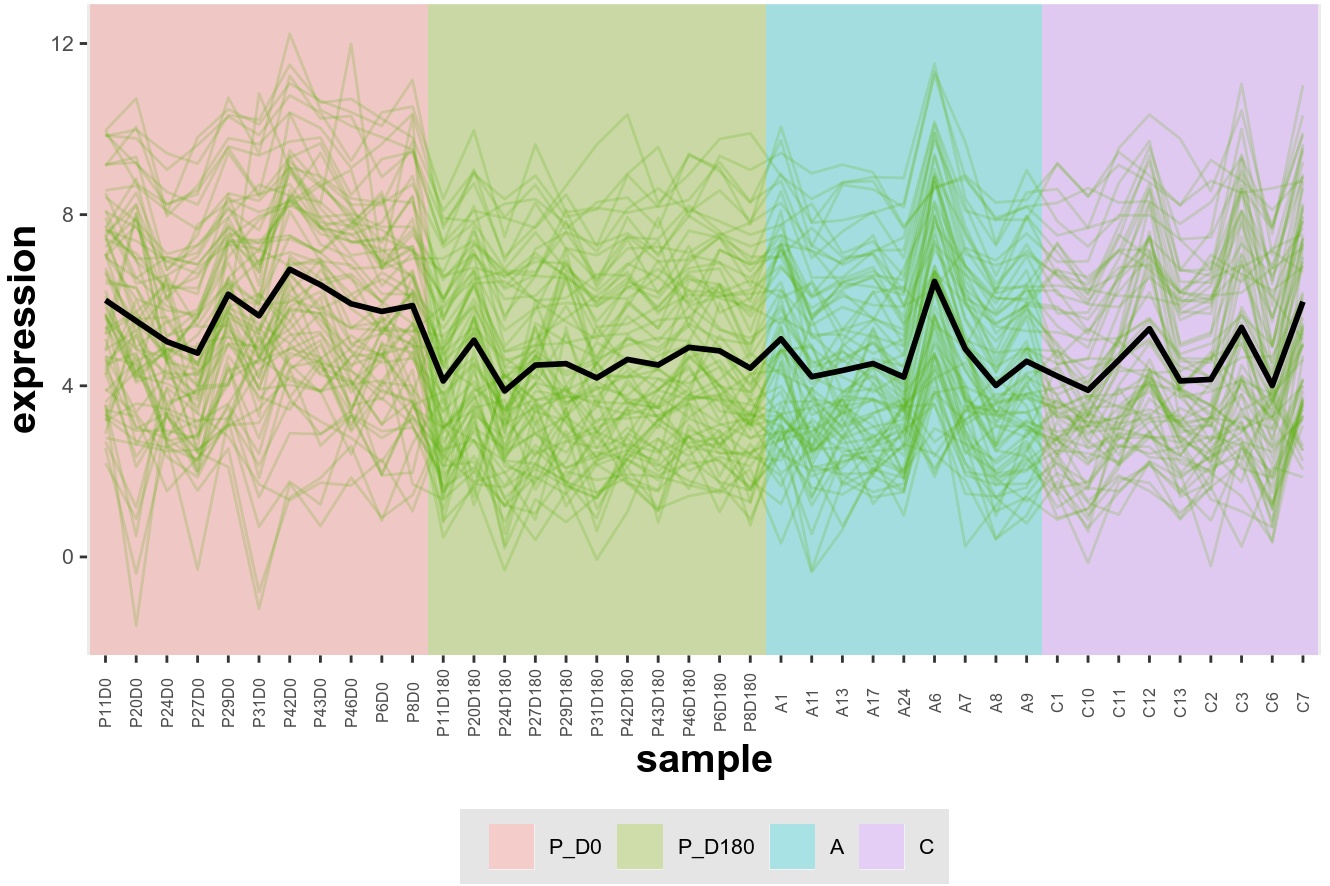

# M6

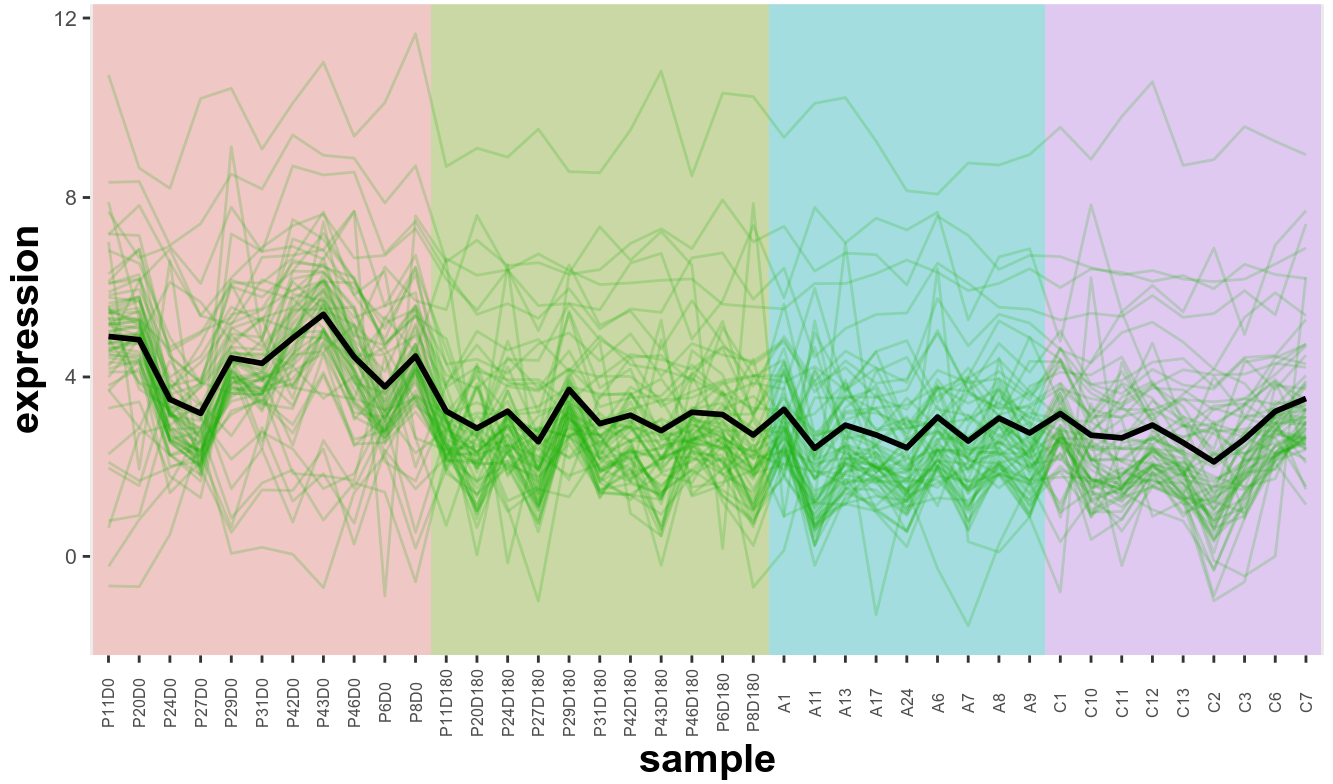

**M7**

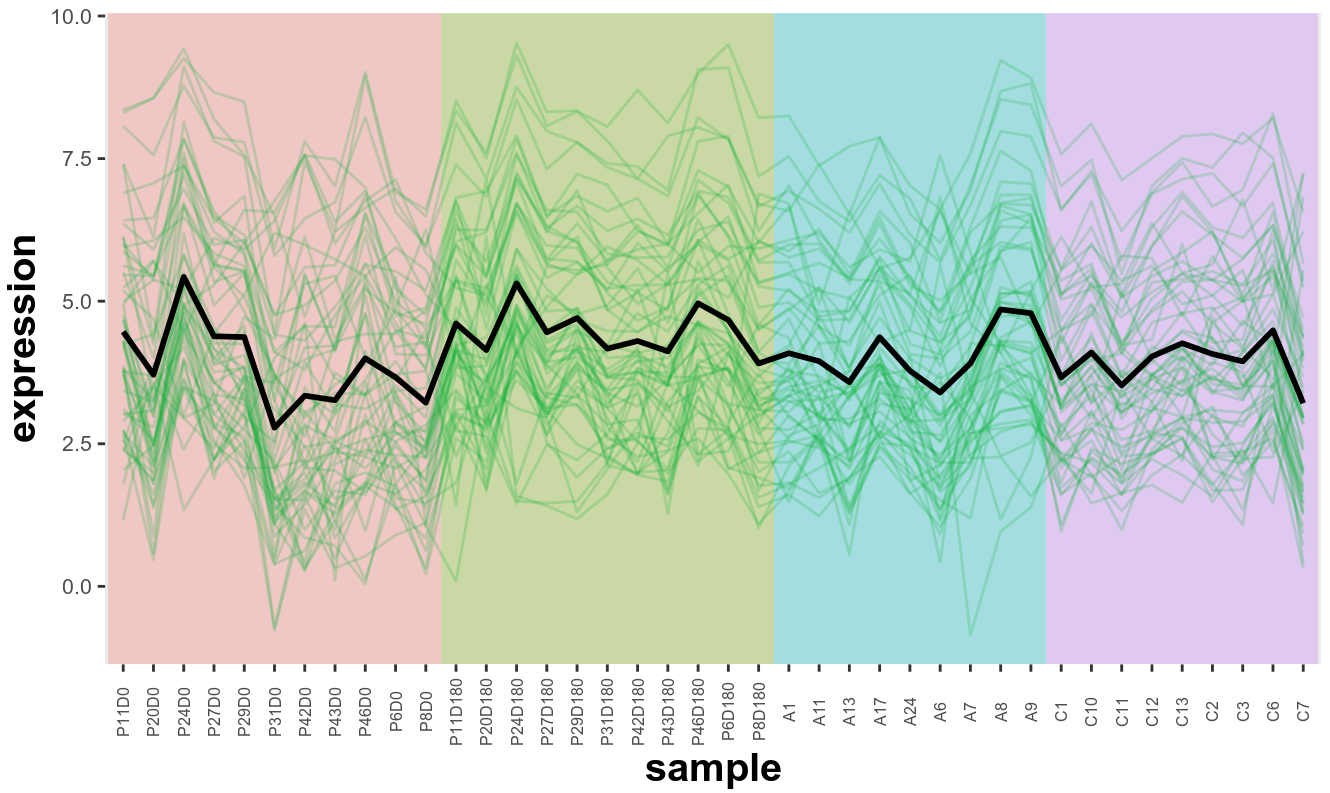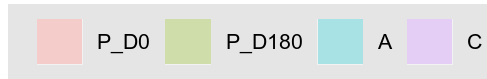



# M8

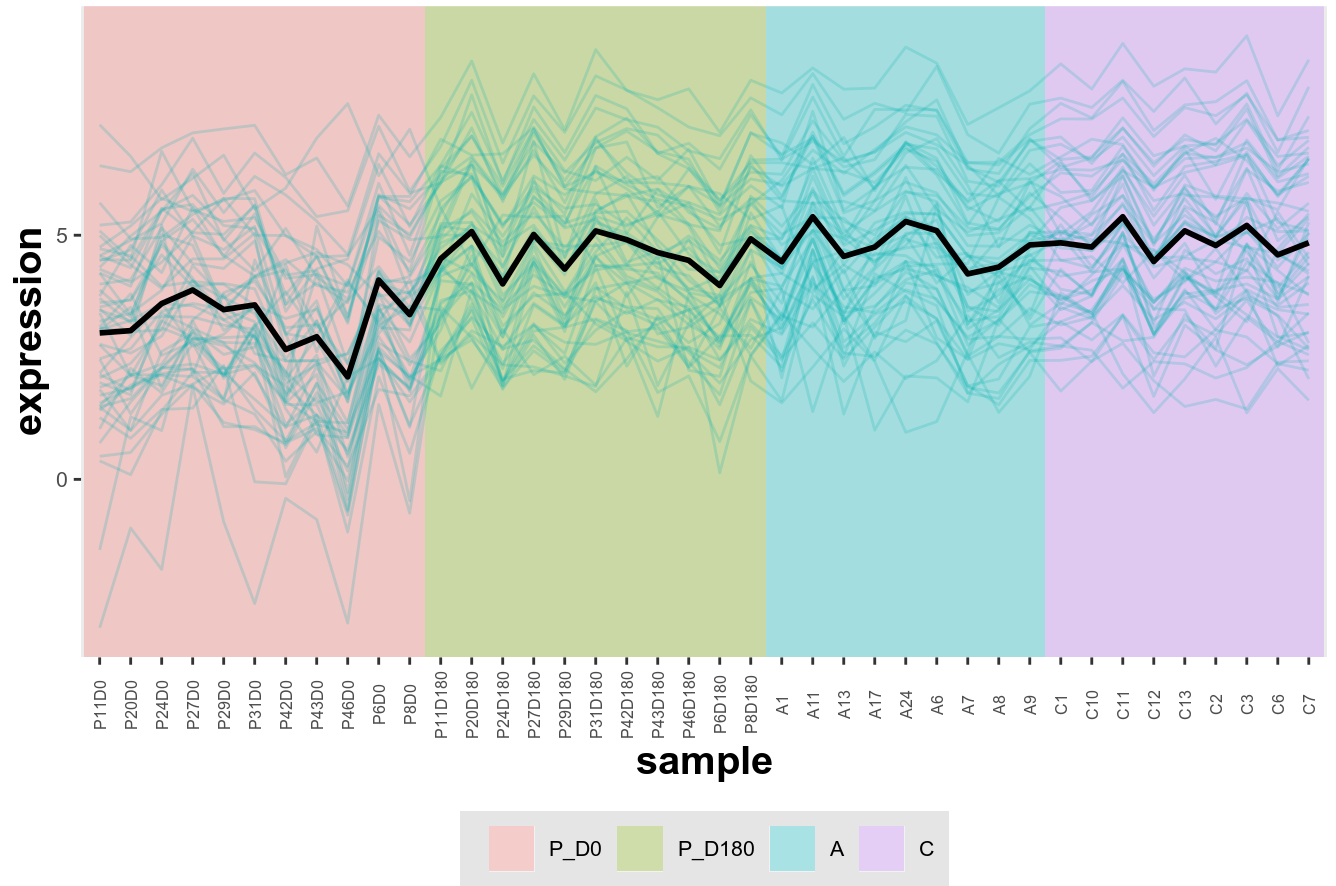

# M9

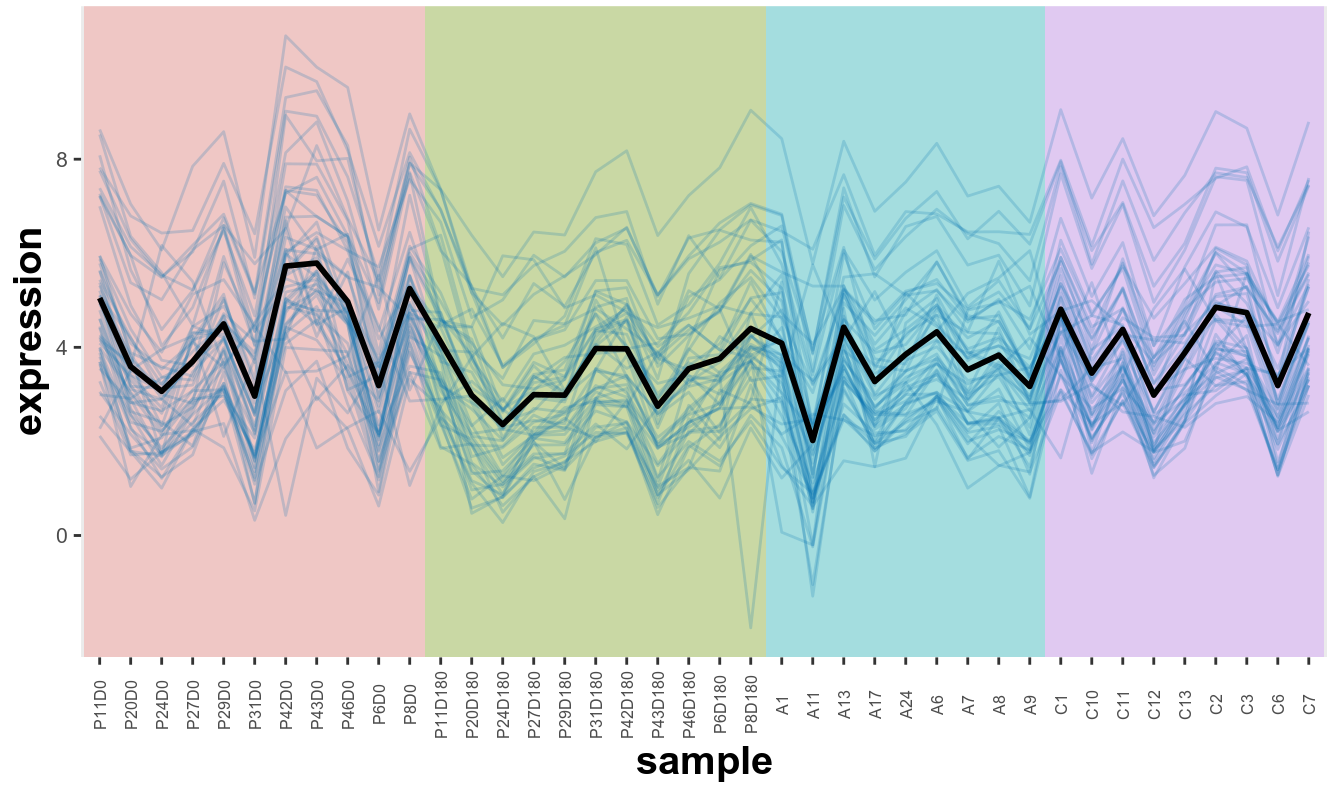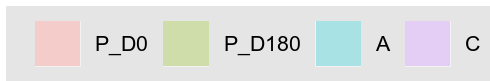

# M10

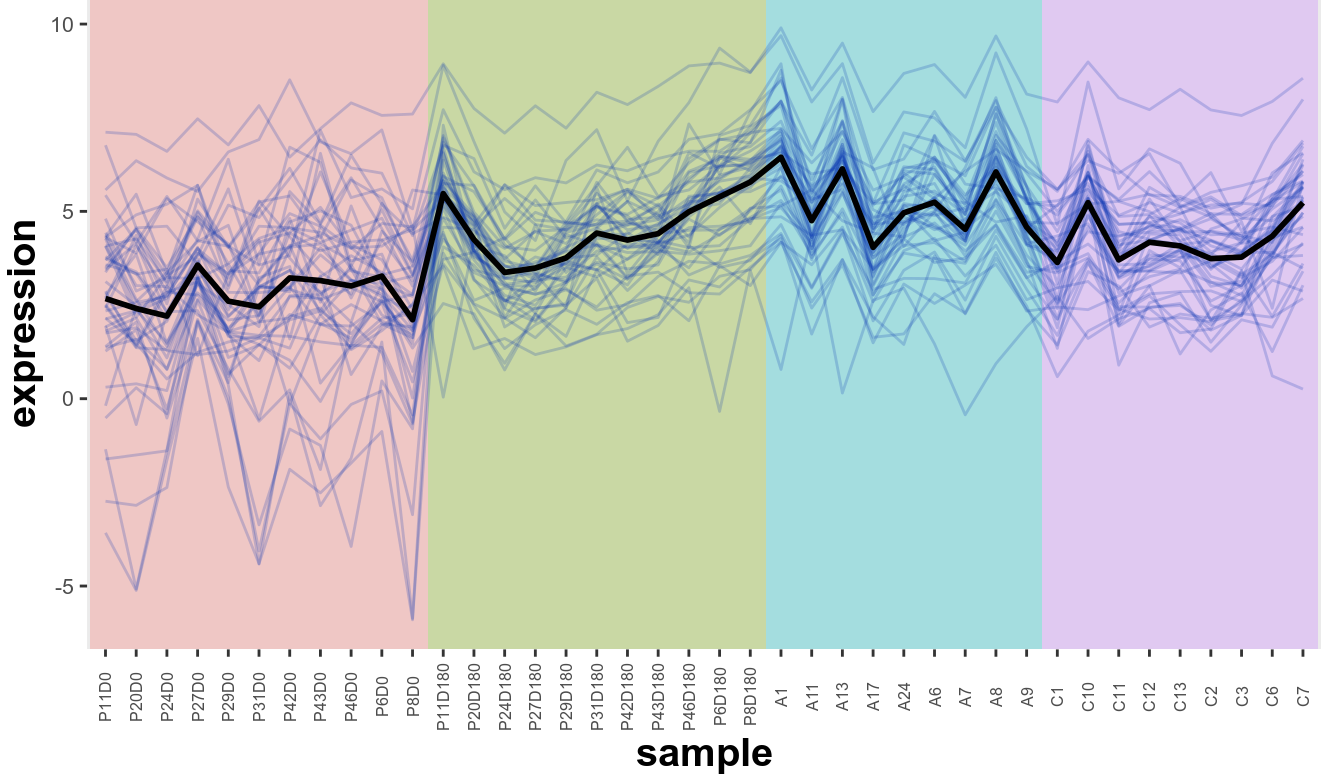

# M11

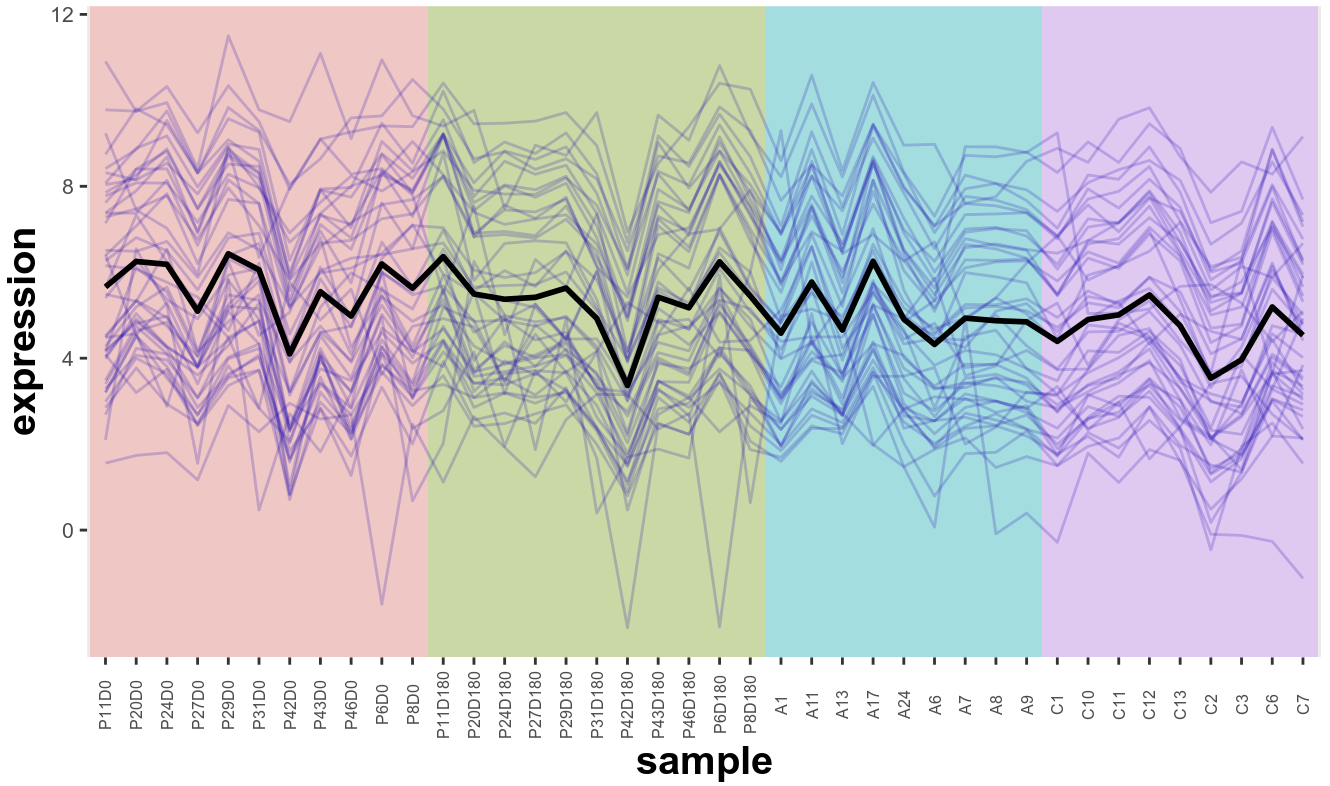

## Not. Correlated

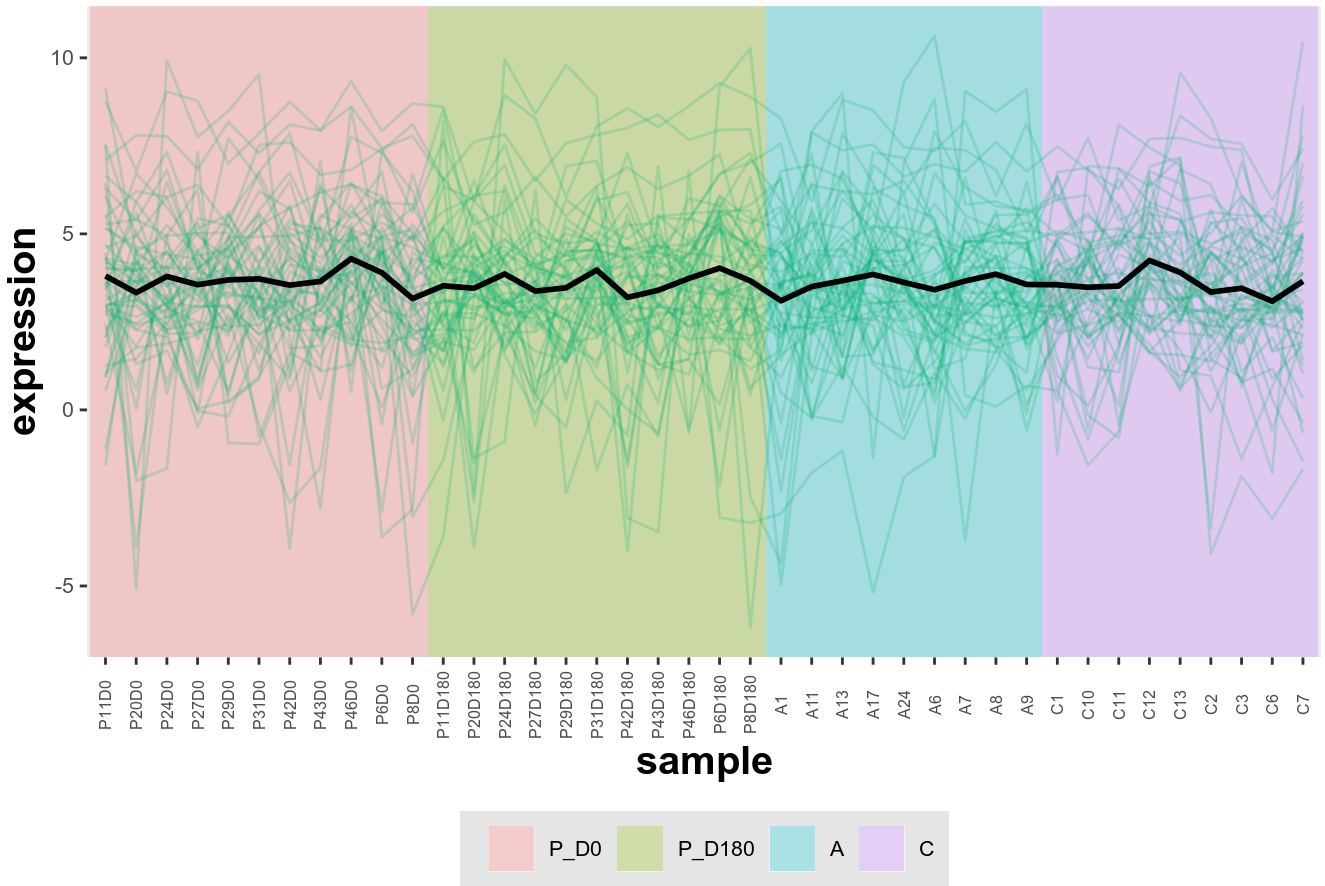

## Gene Set Enrichment Analysis

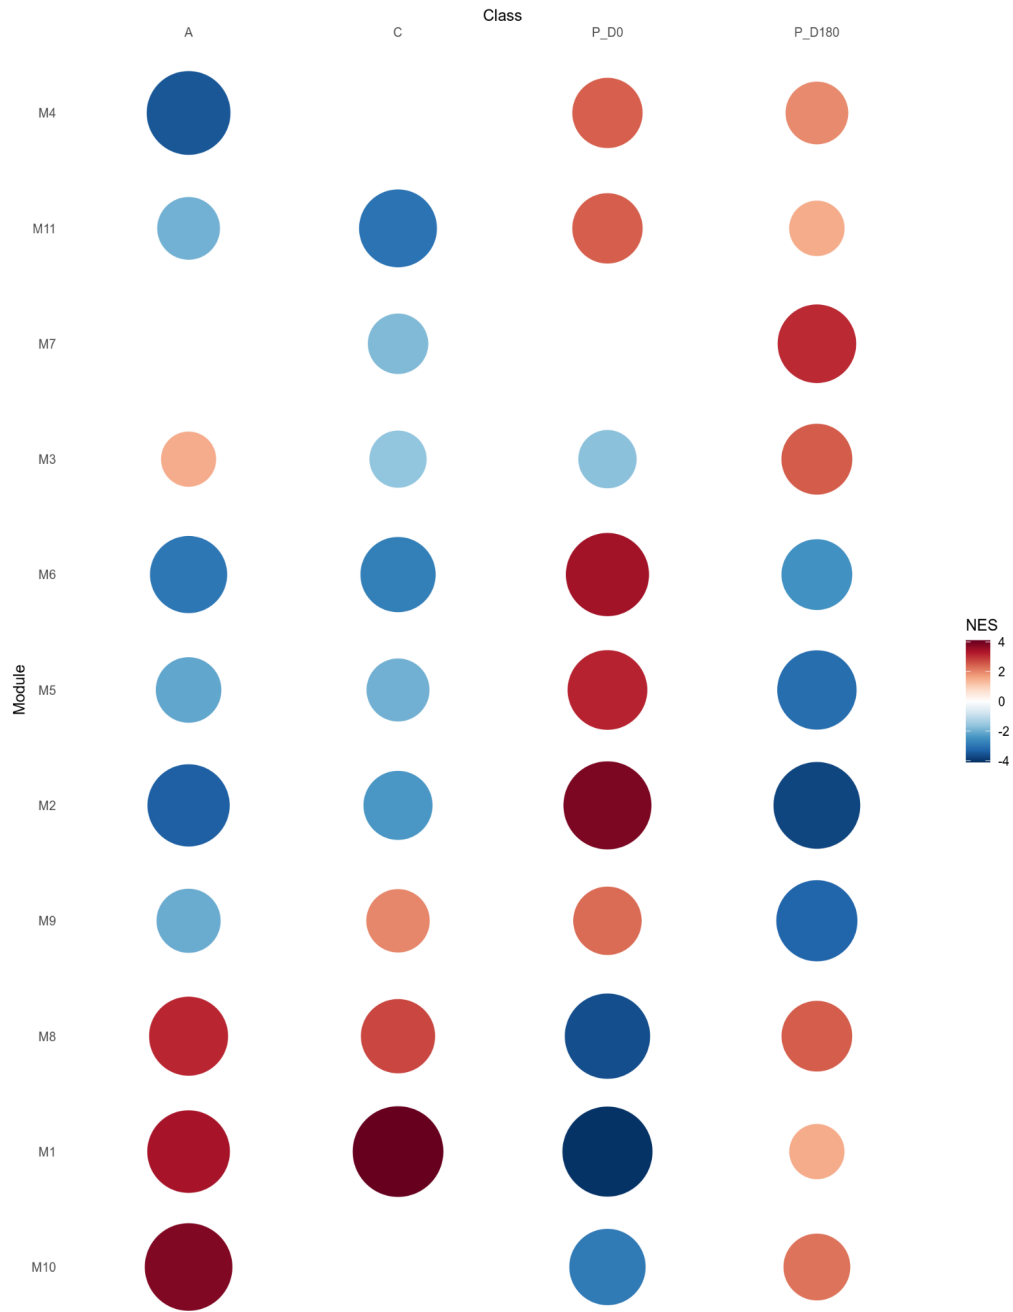

Over Representation Analysis

M1

# M1

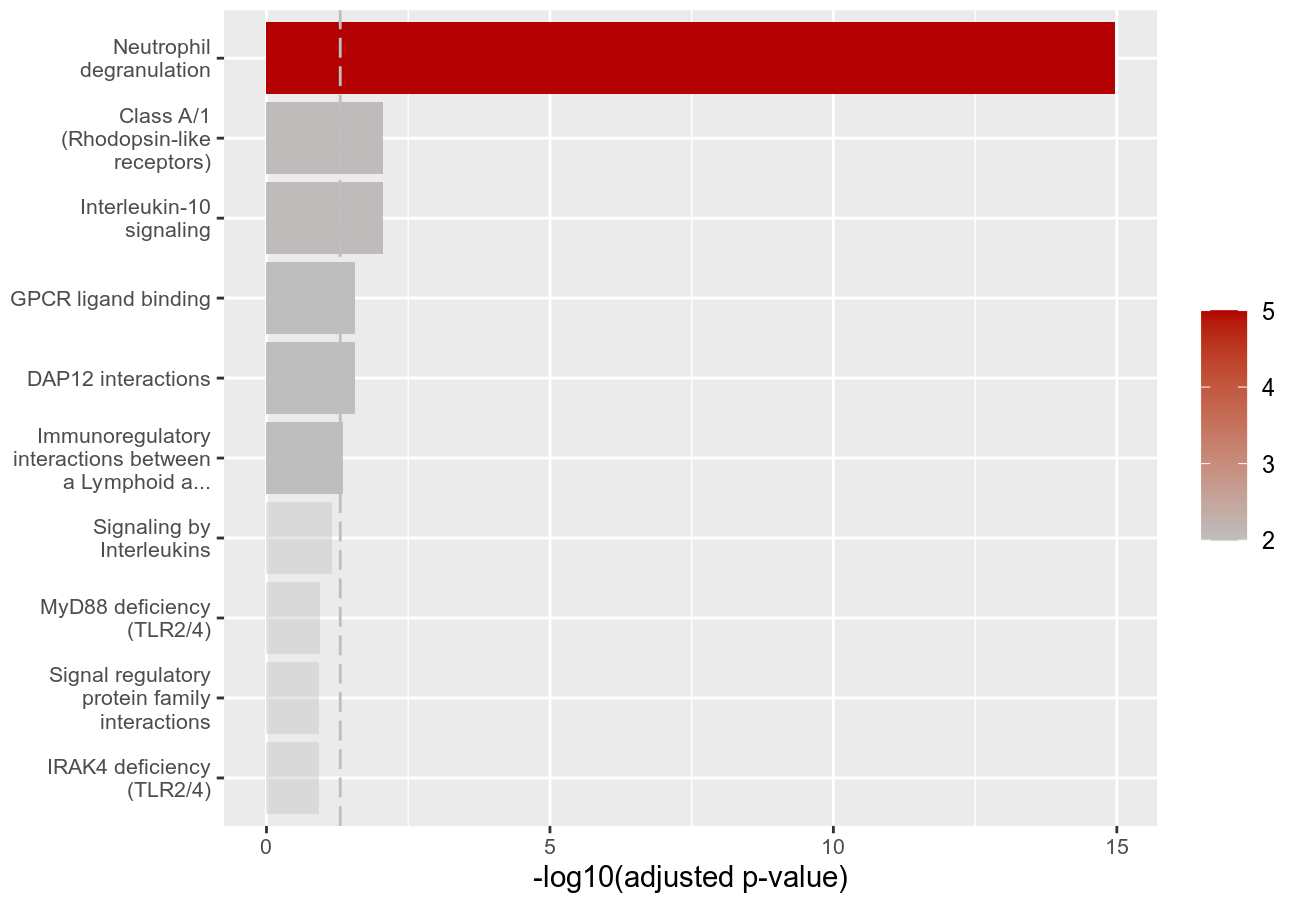

# M2

## M2

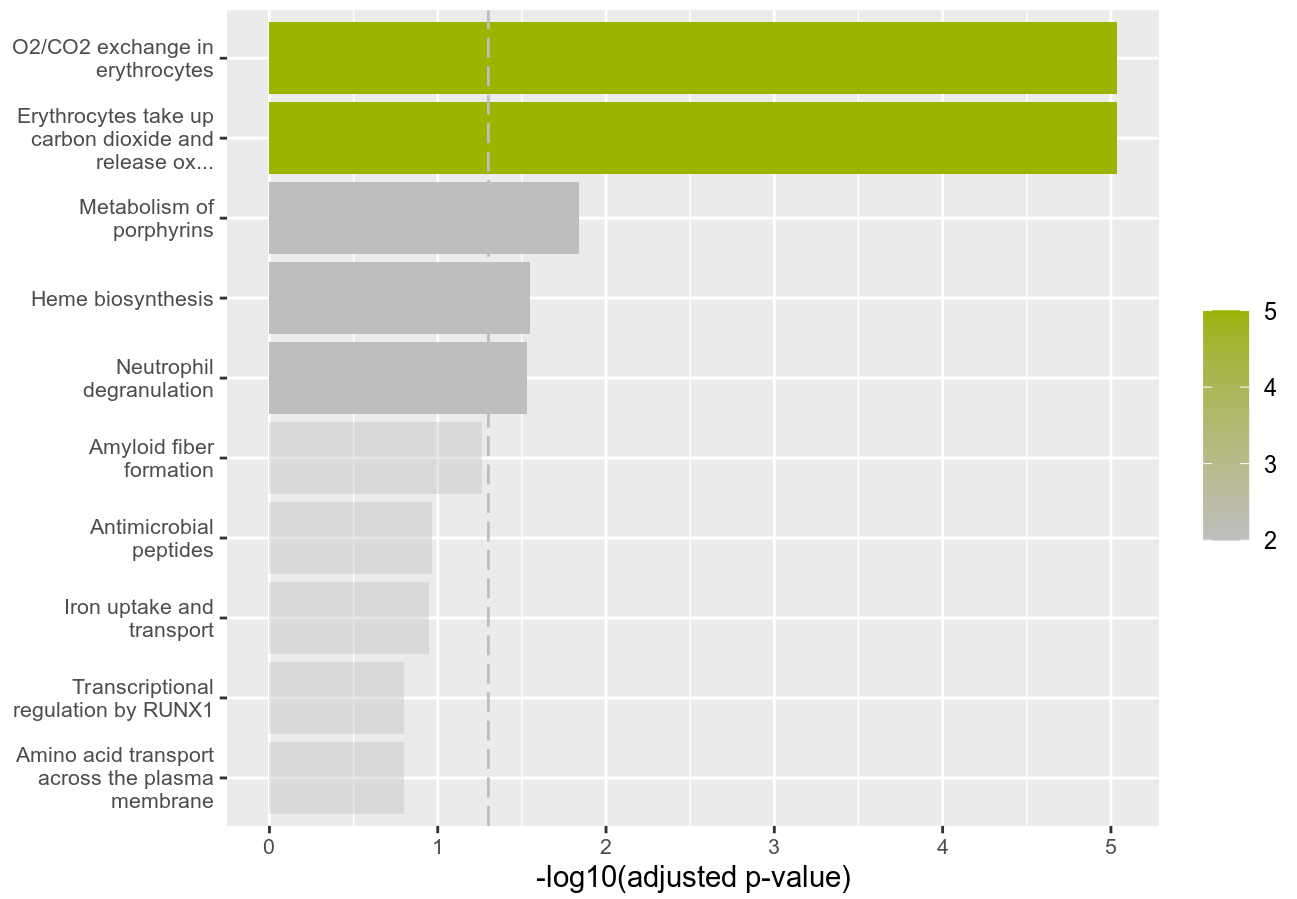

## M3



### M3

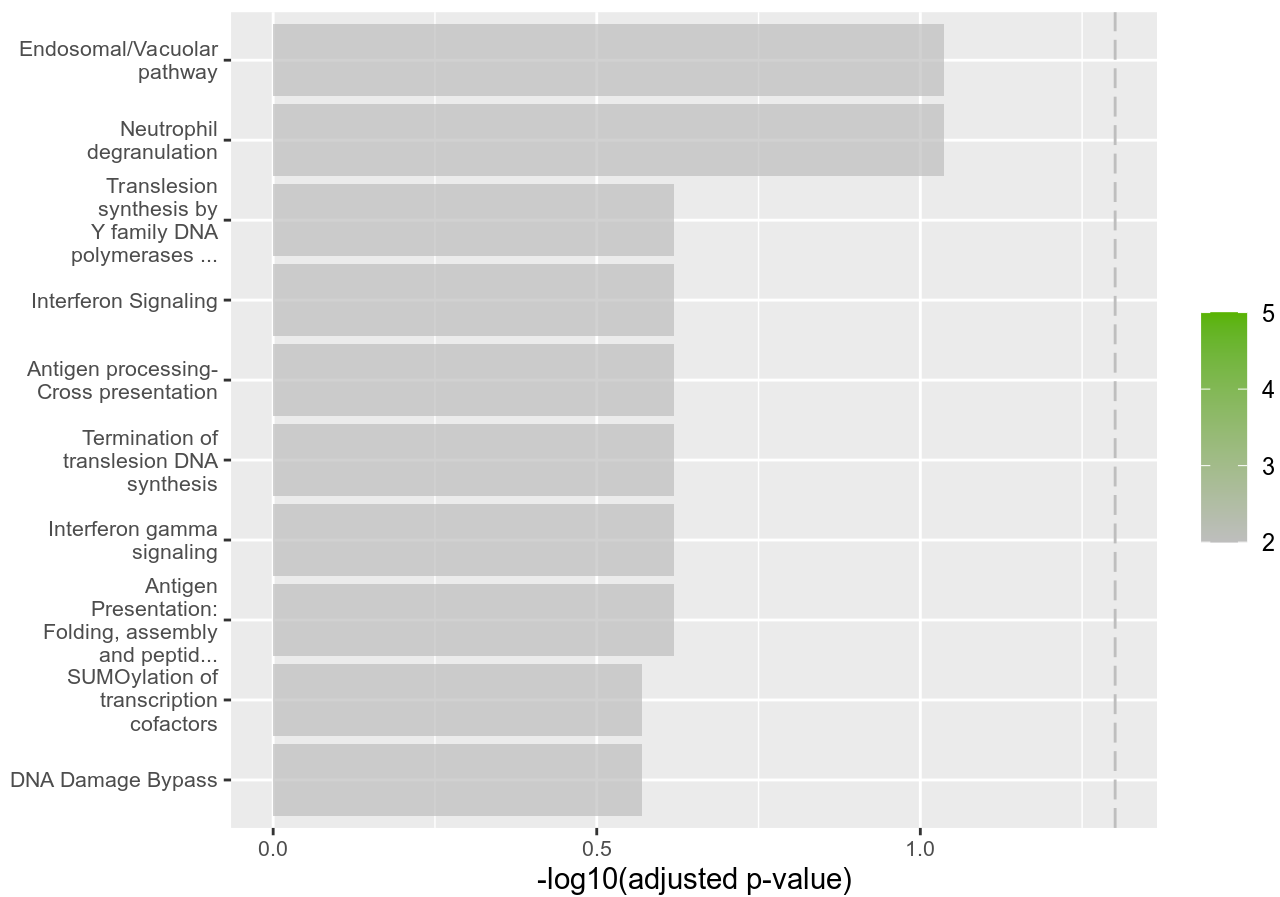

### M4

### M4

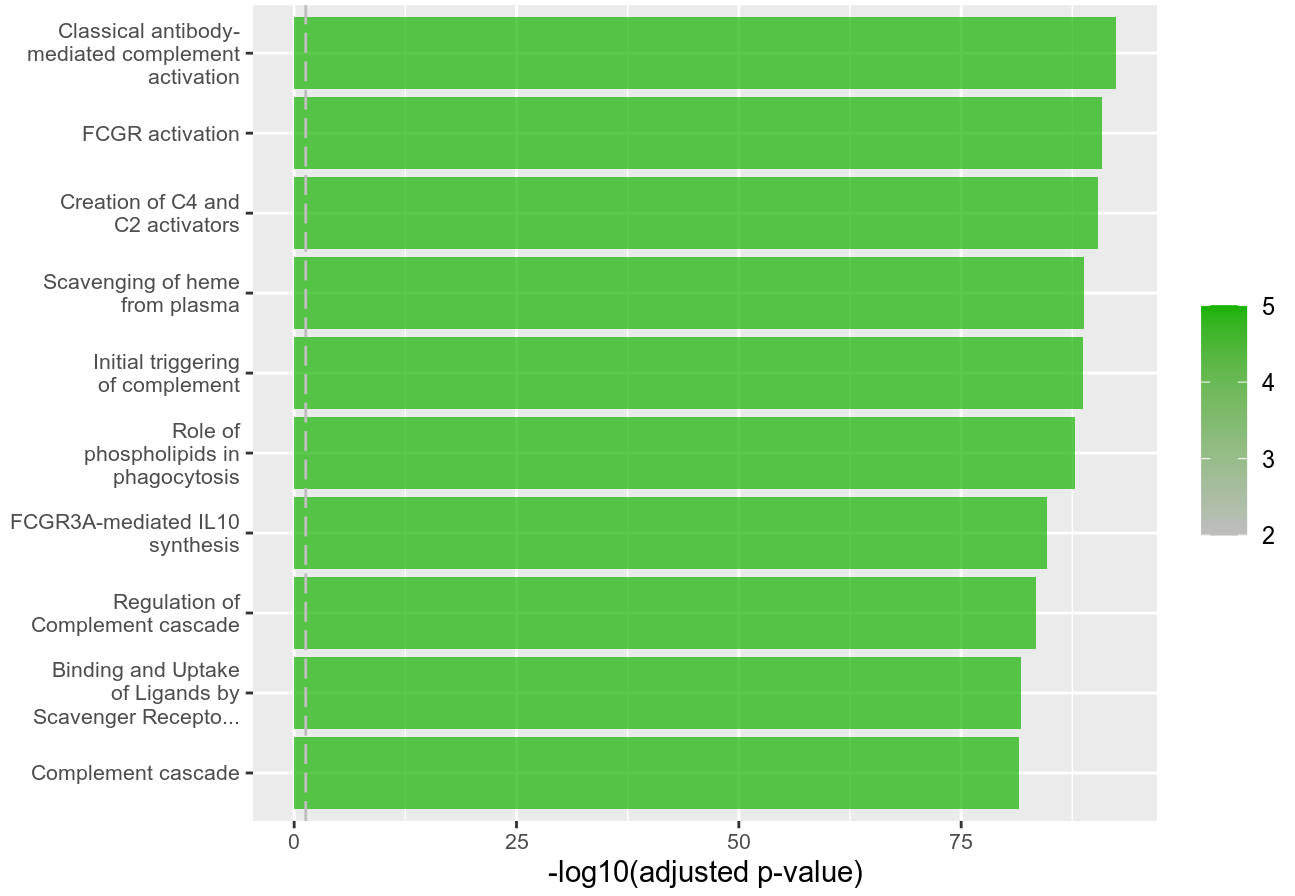

### M5

### M5

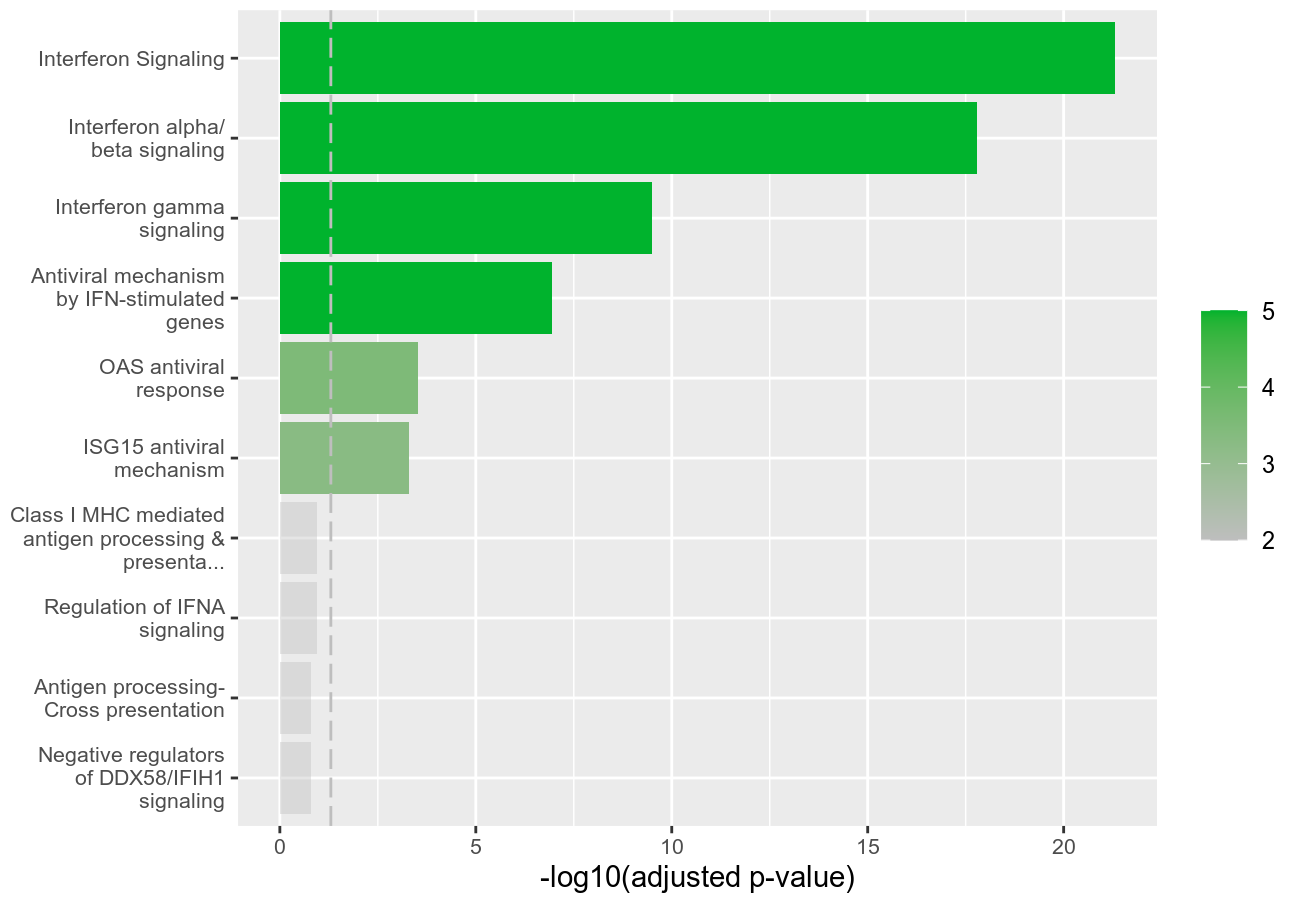

### M6

## M6

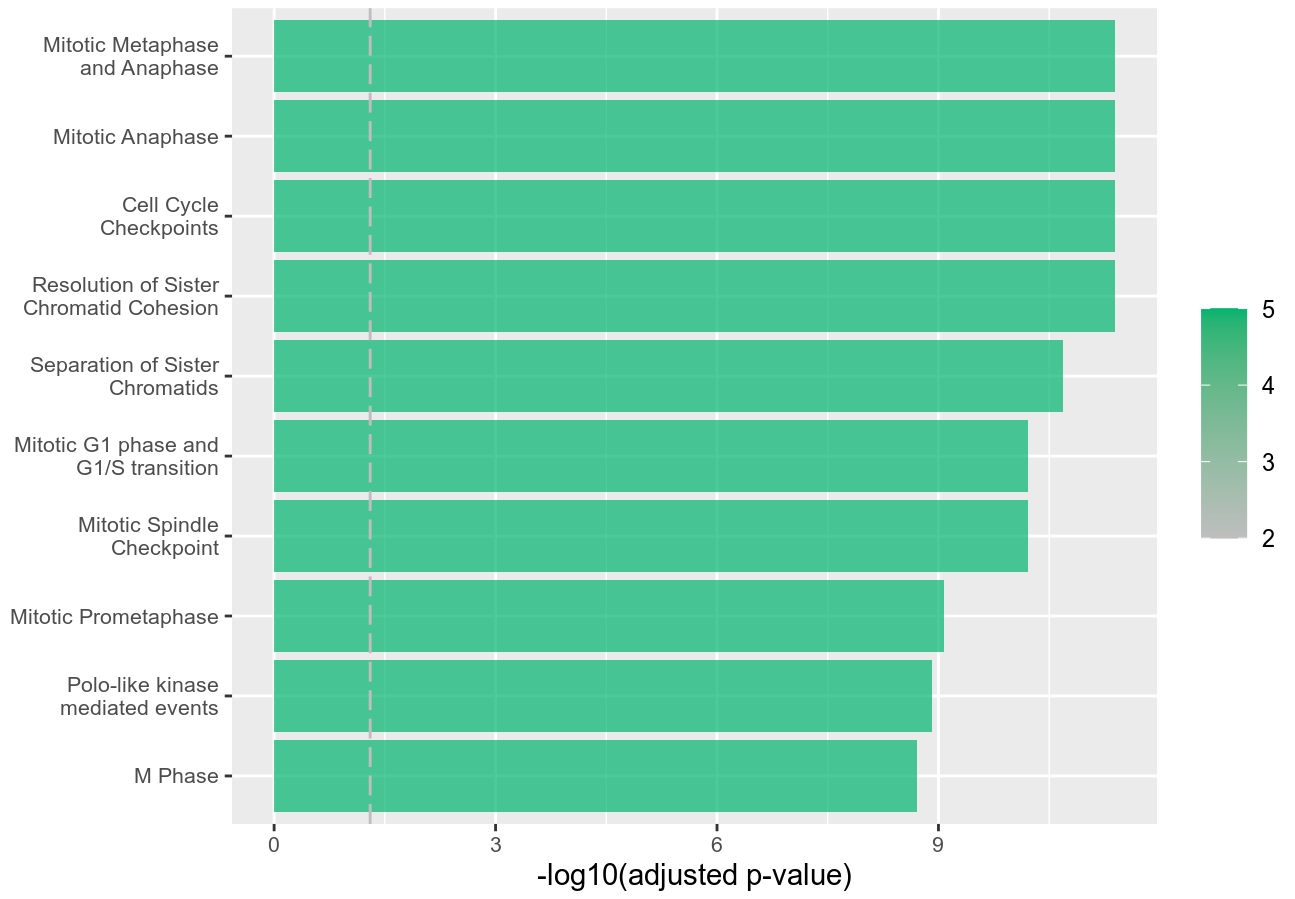

## M7

### M7

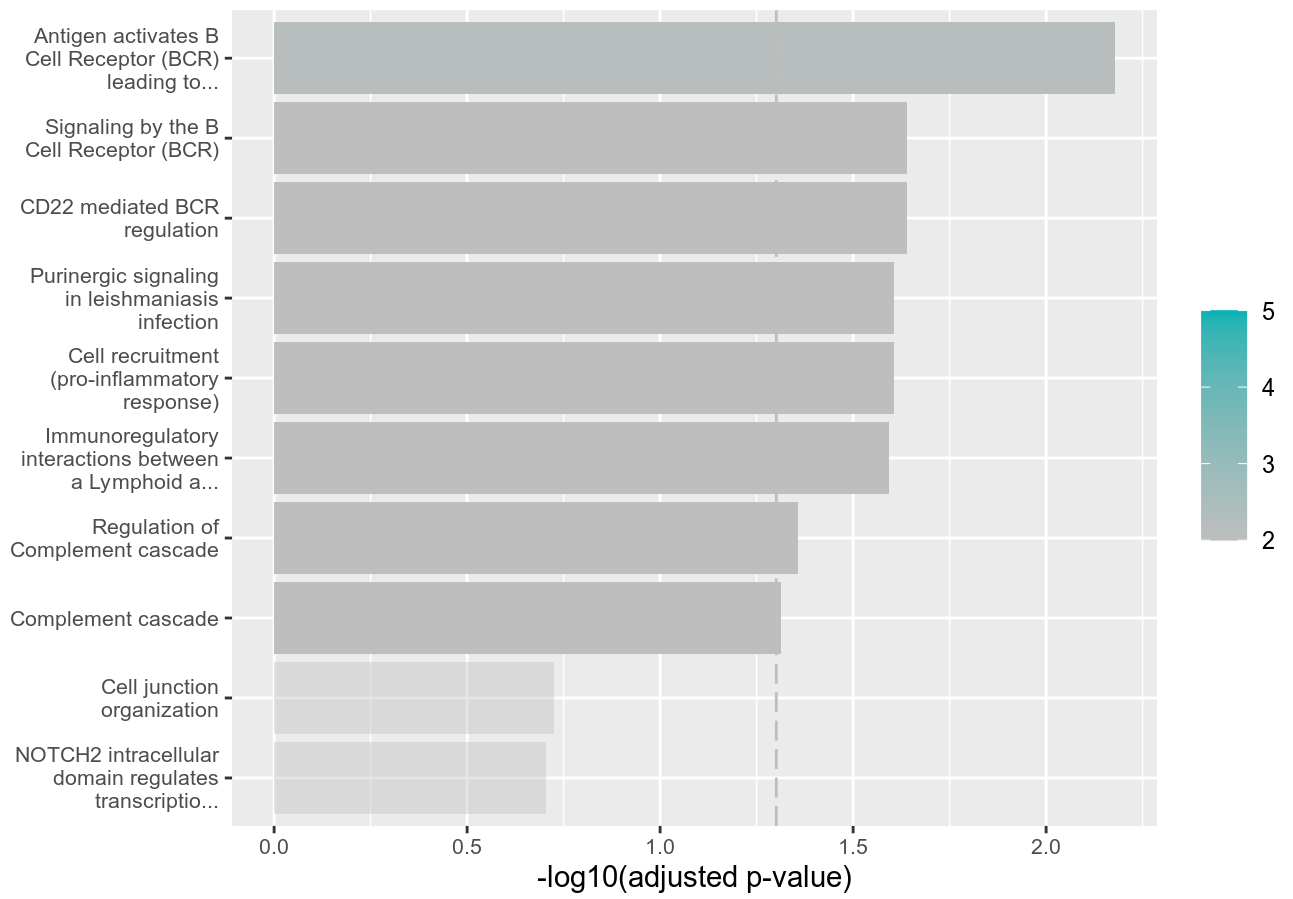

### M8

### M8

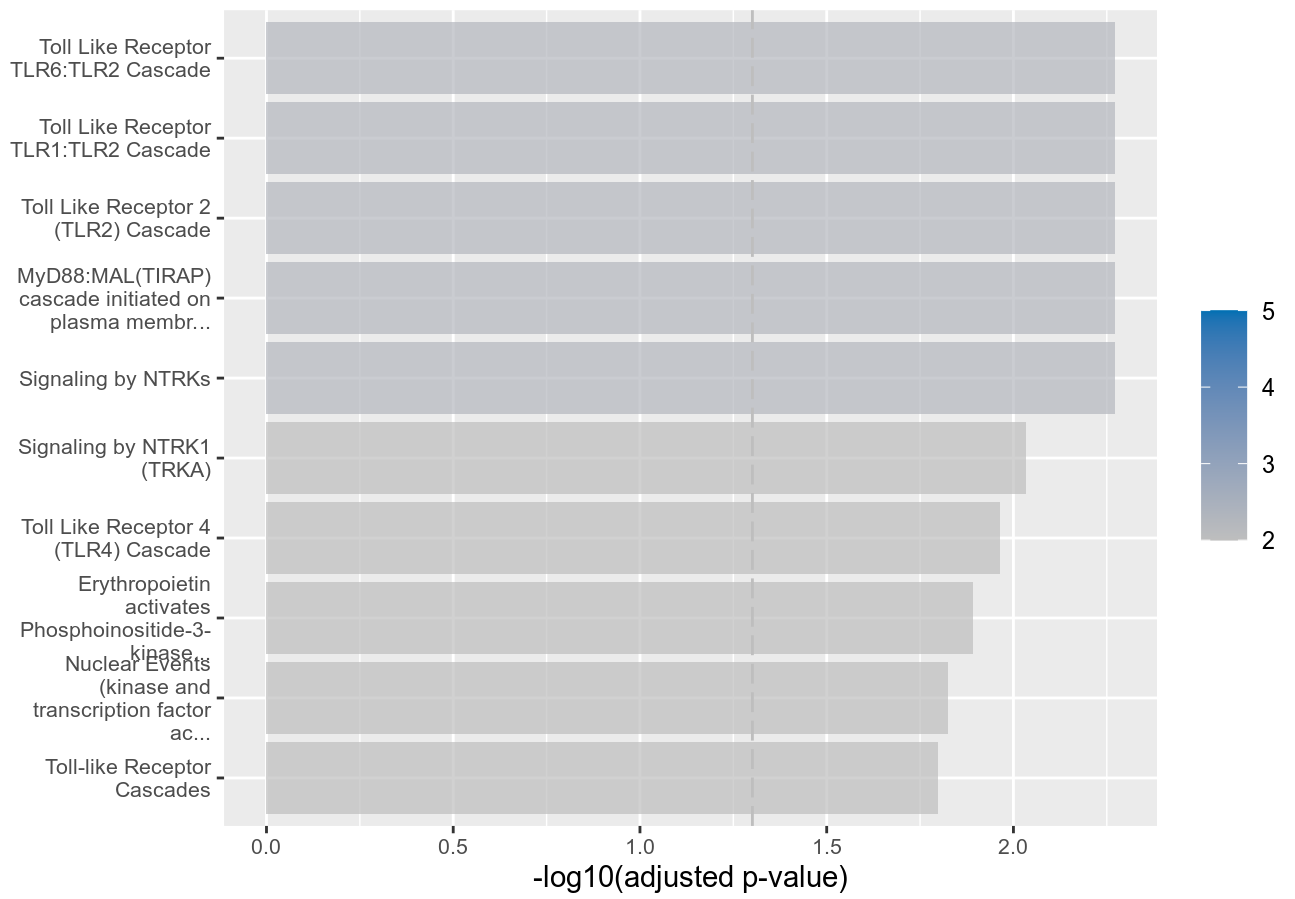

### M9

### M9

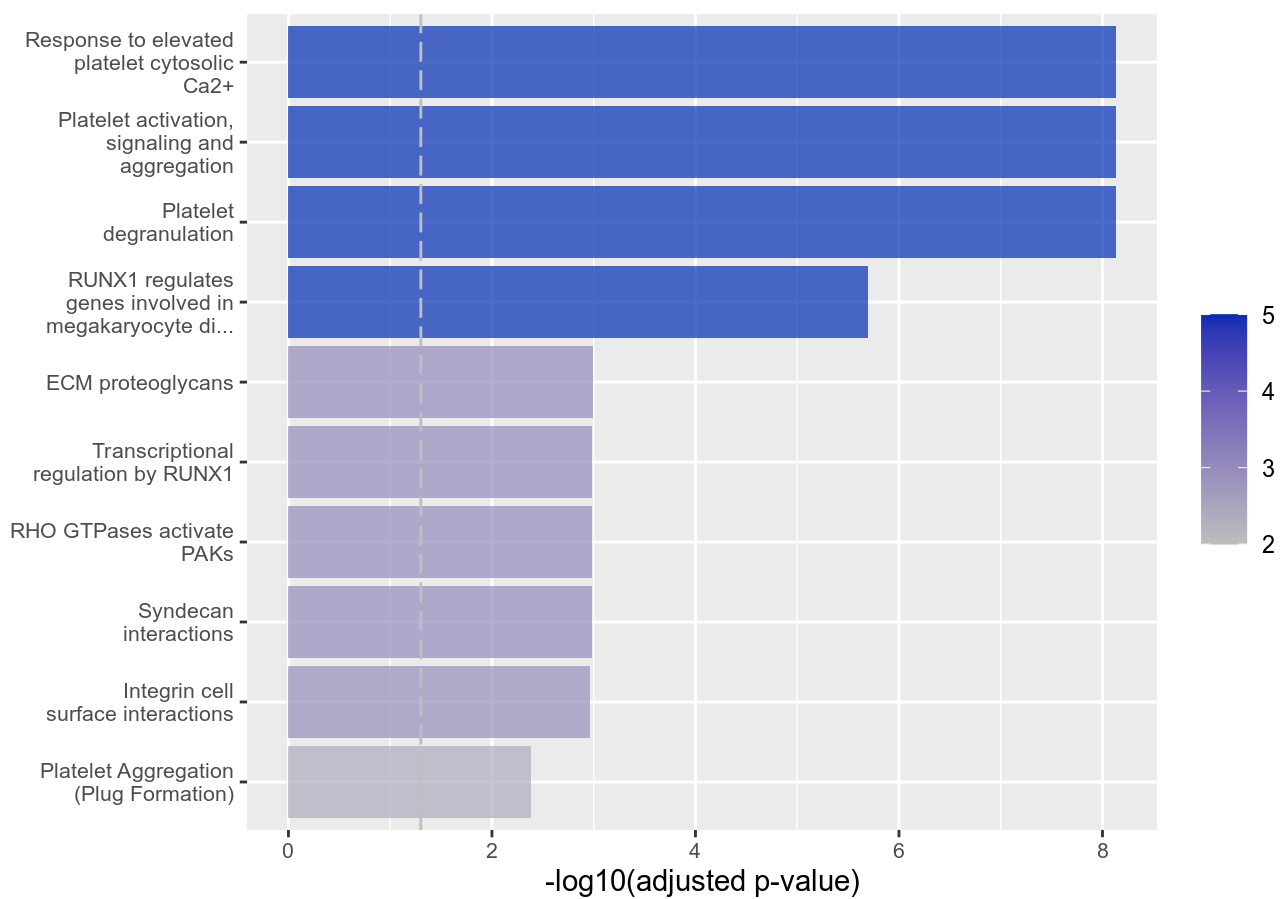

### M10

### M10

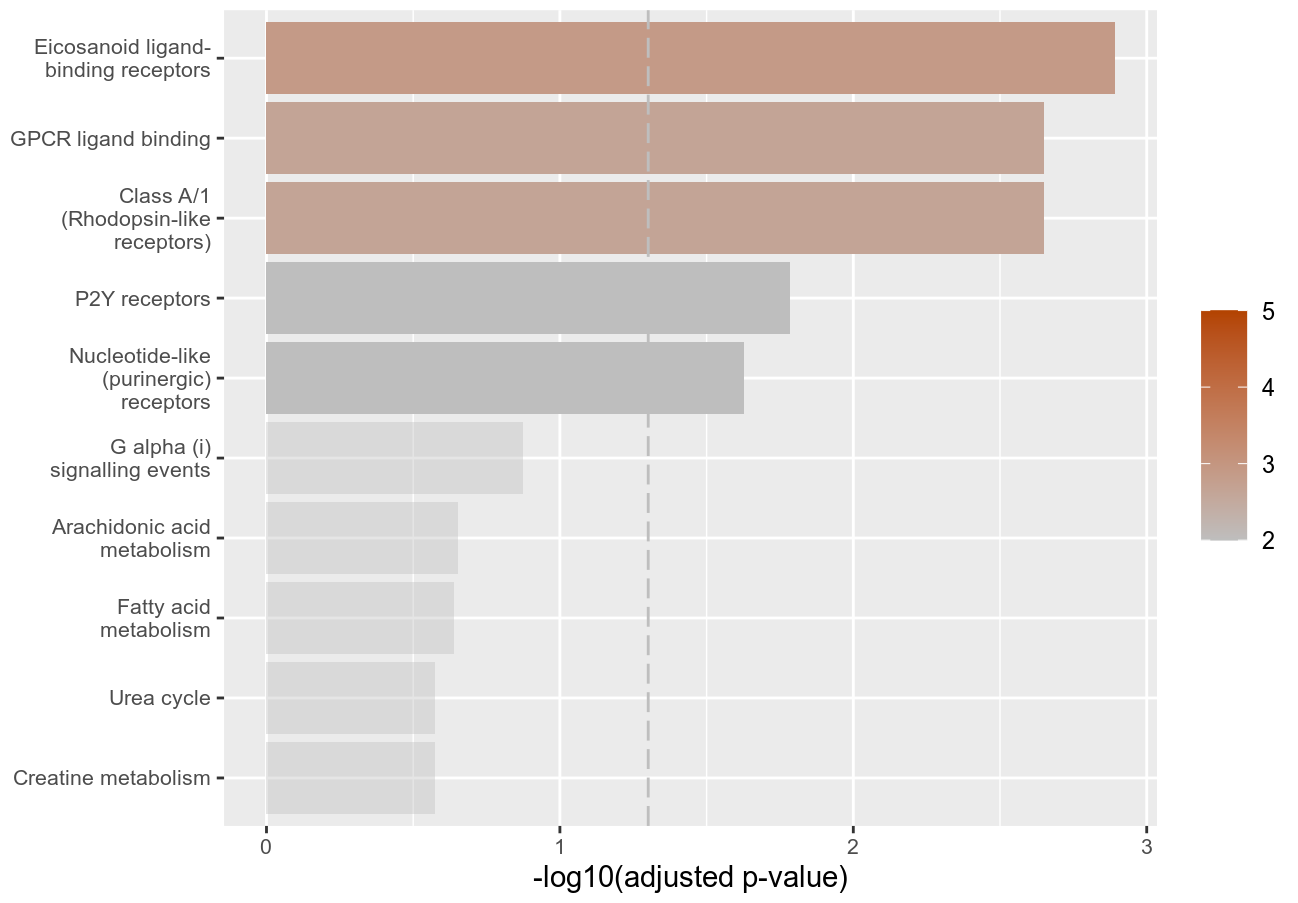

### M11



# M11

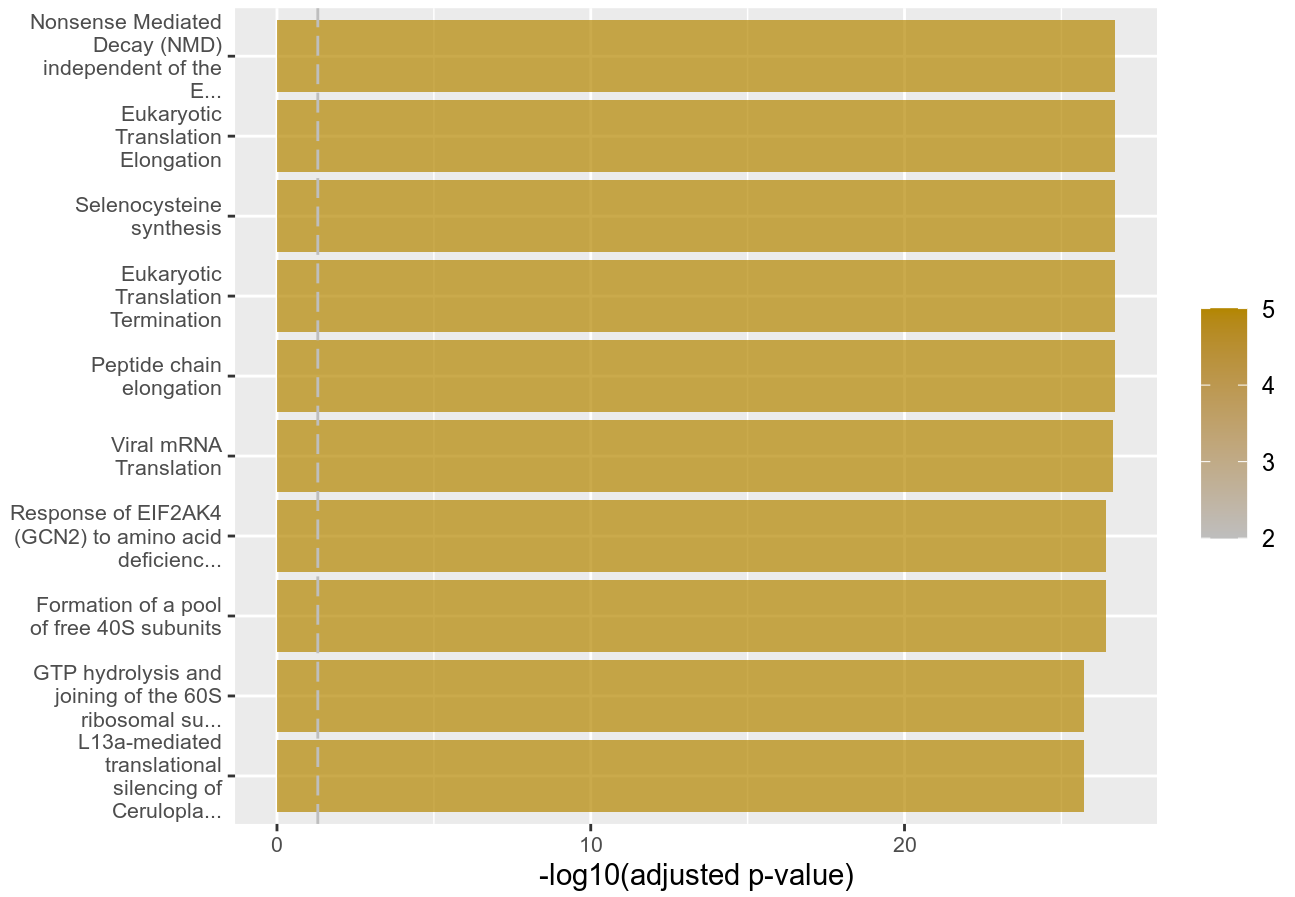

Not.Correlated

## Not.Correlated

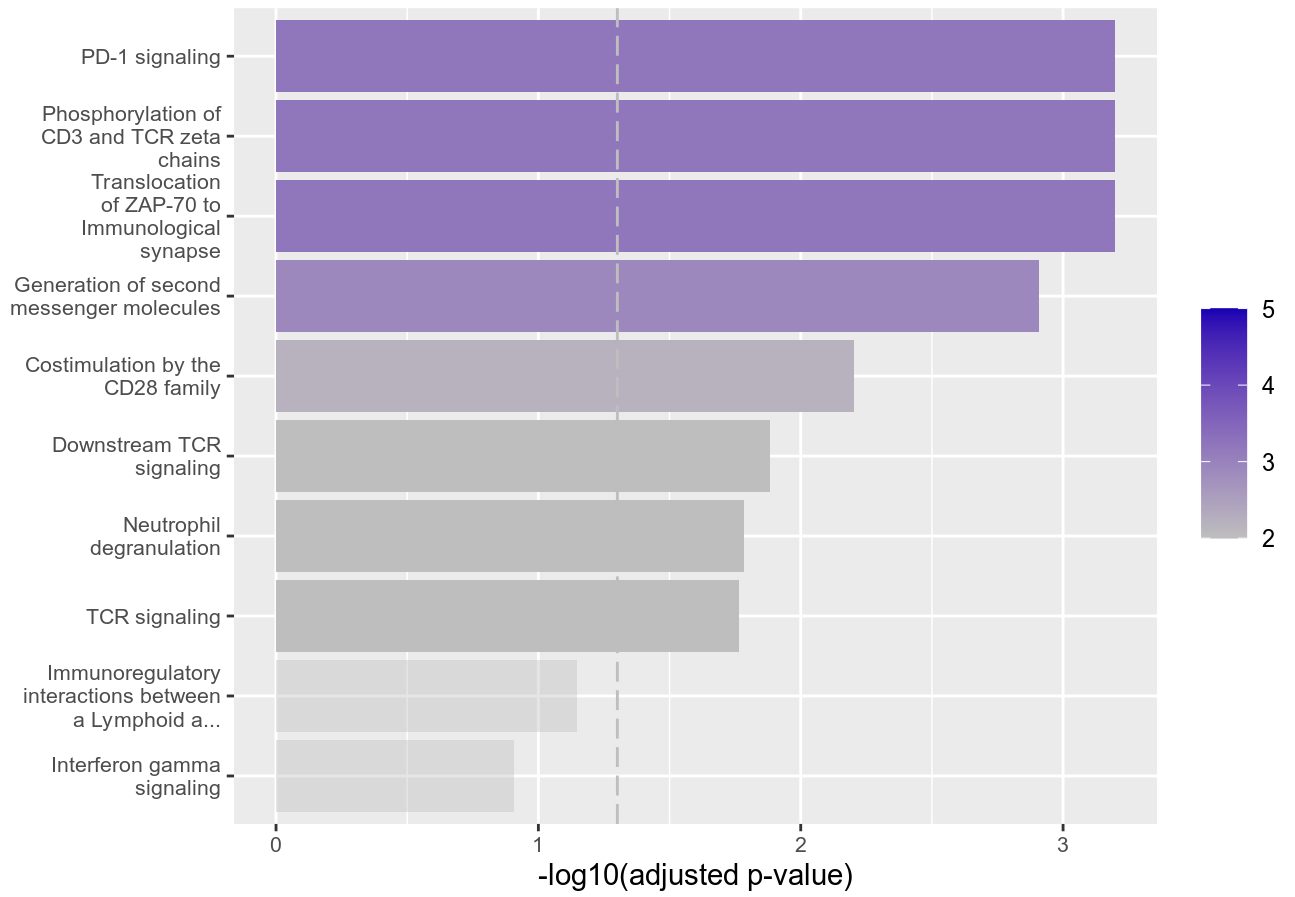

Interaction Network

M1

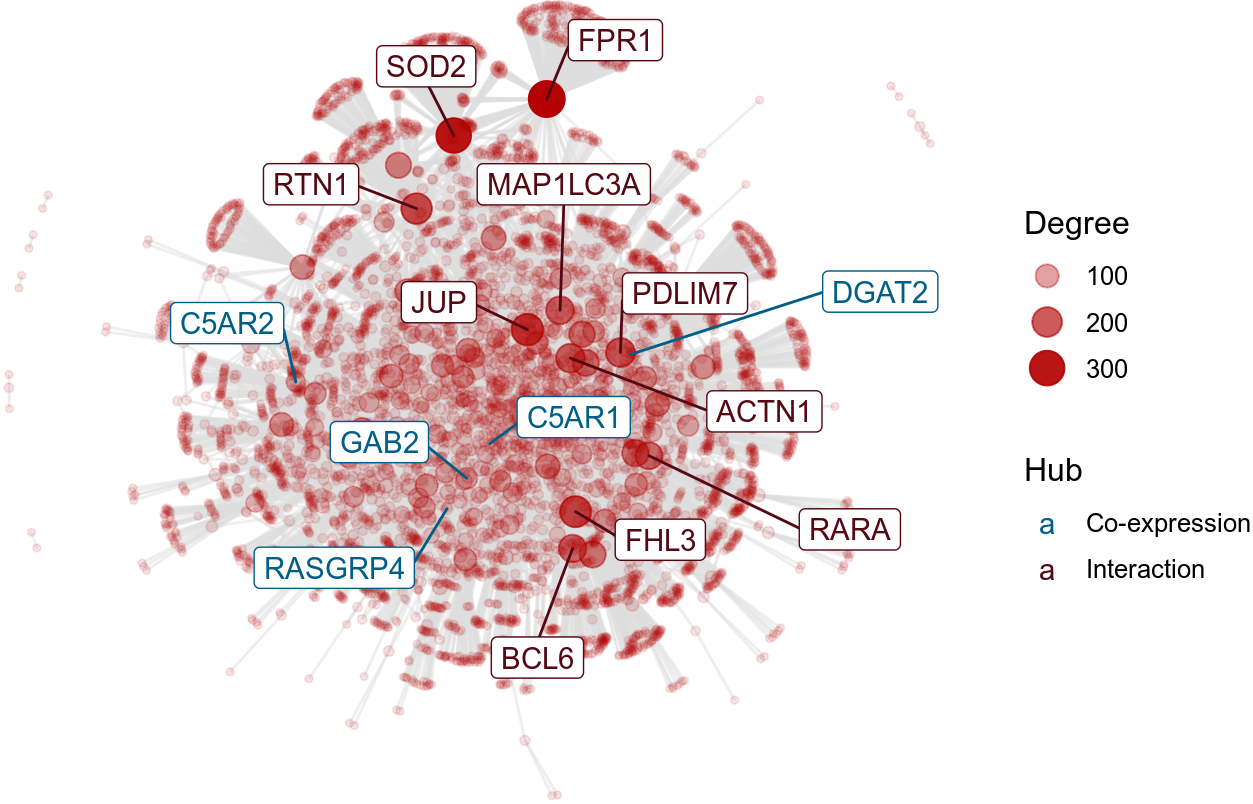

M2

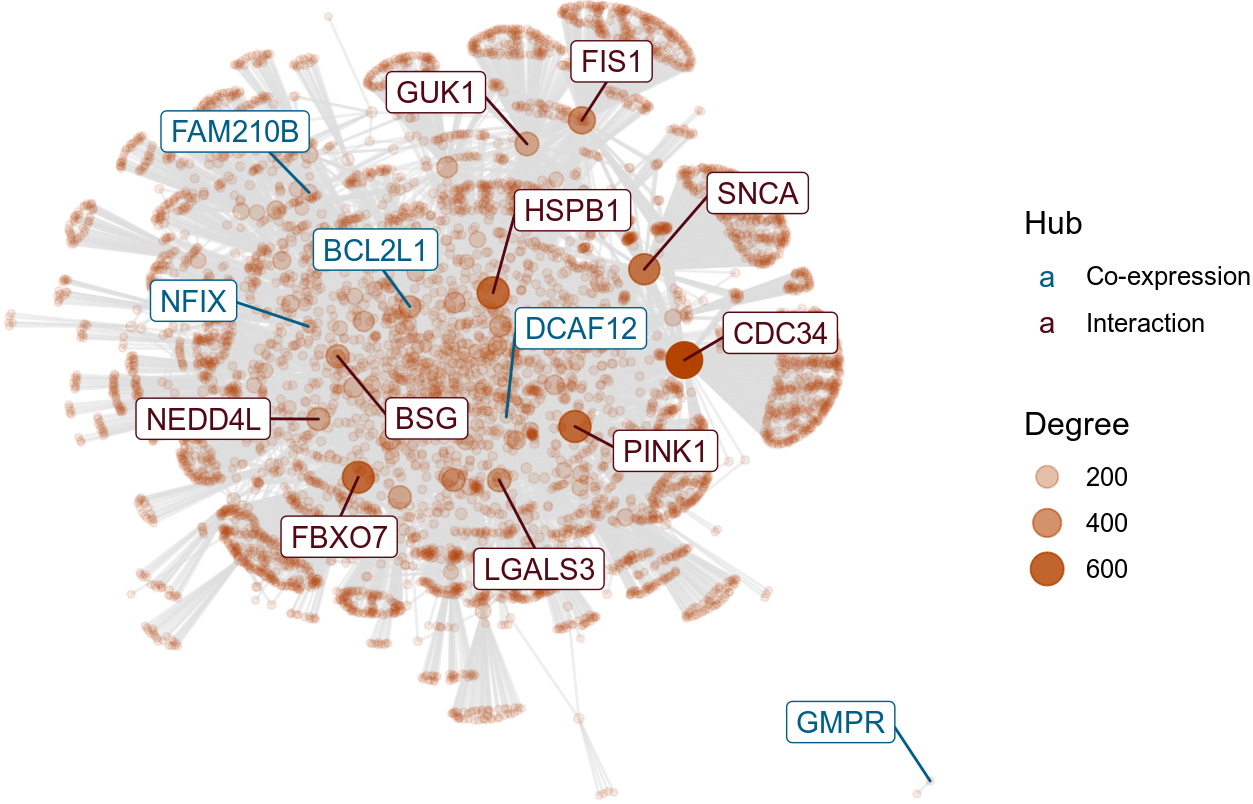

M3

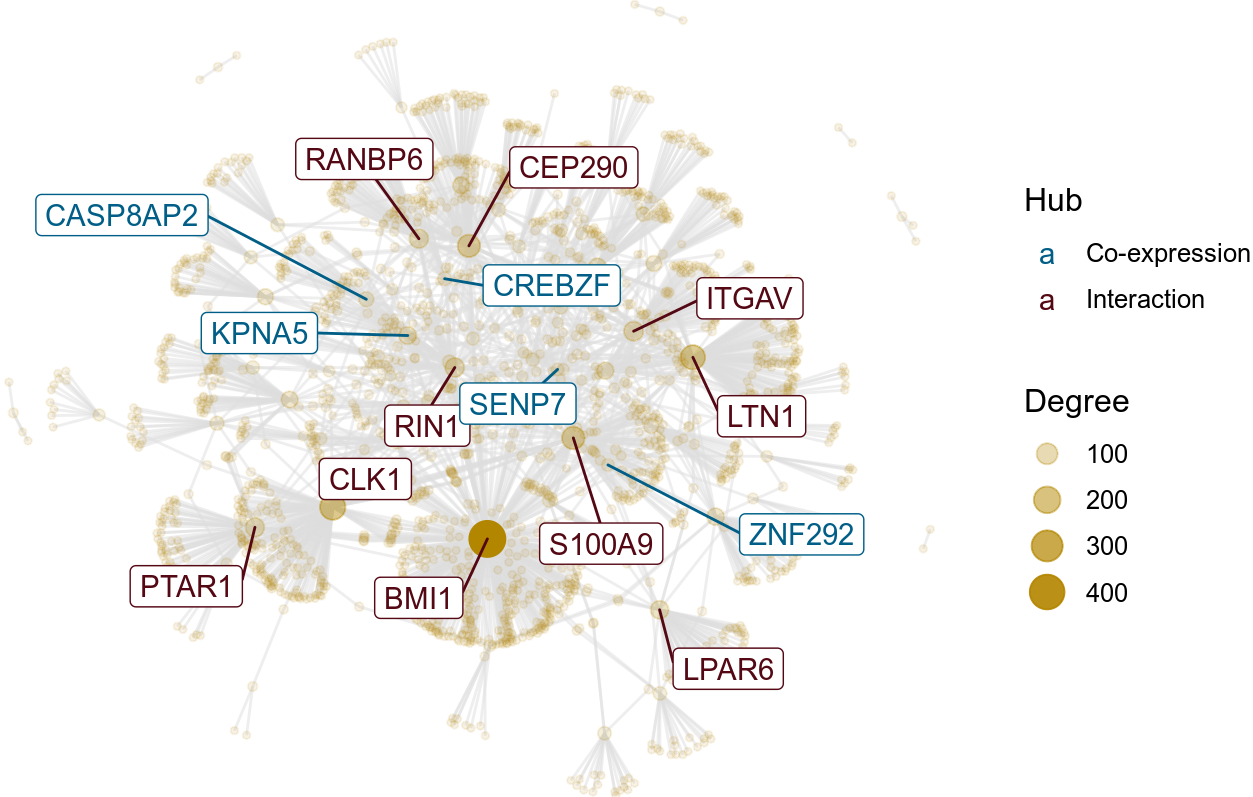

M4

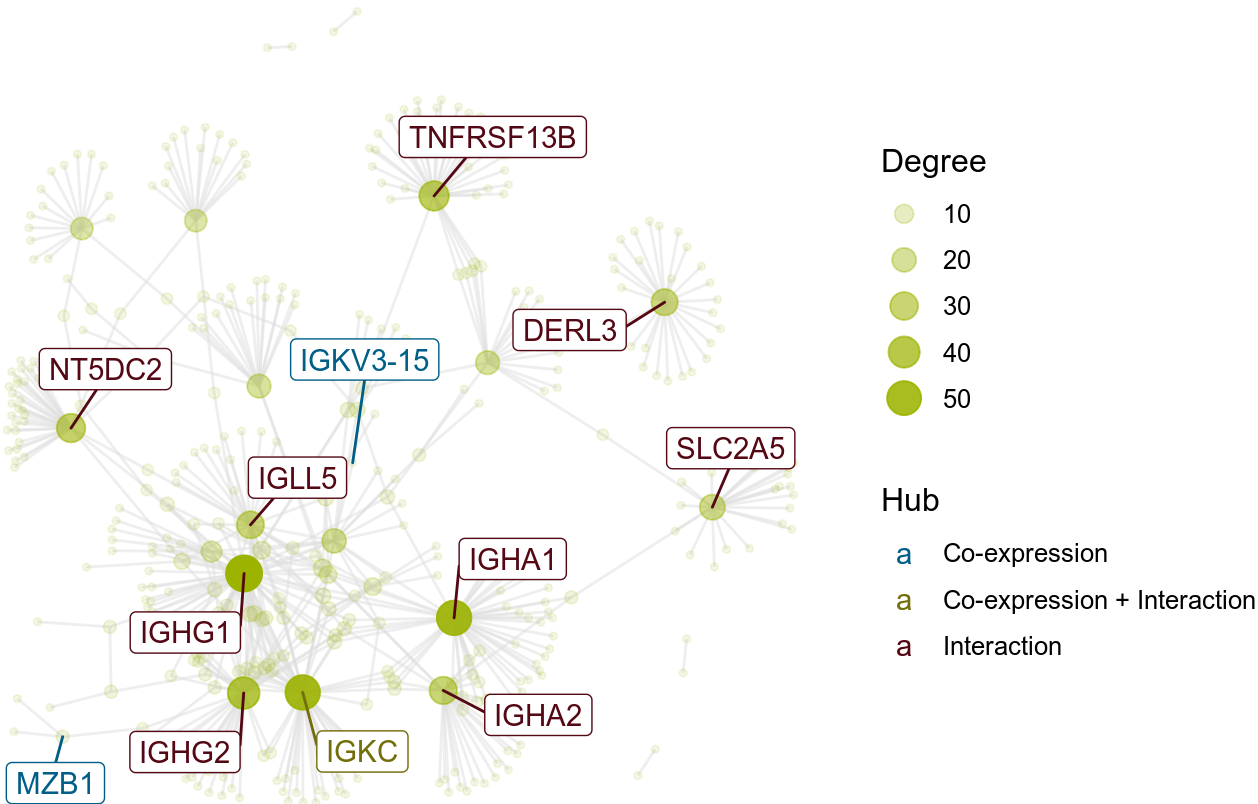

M5

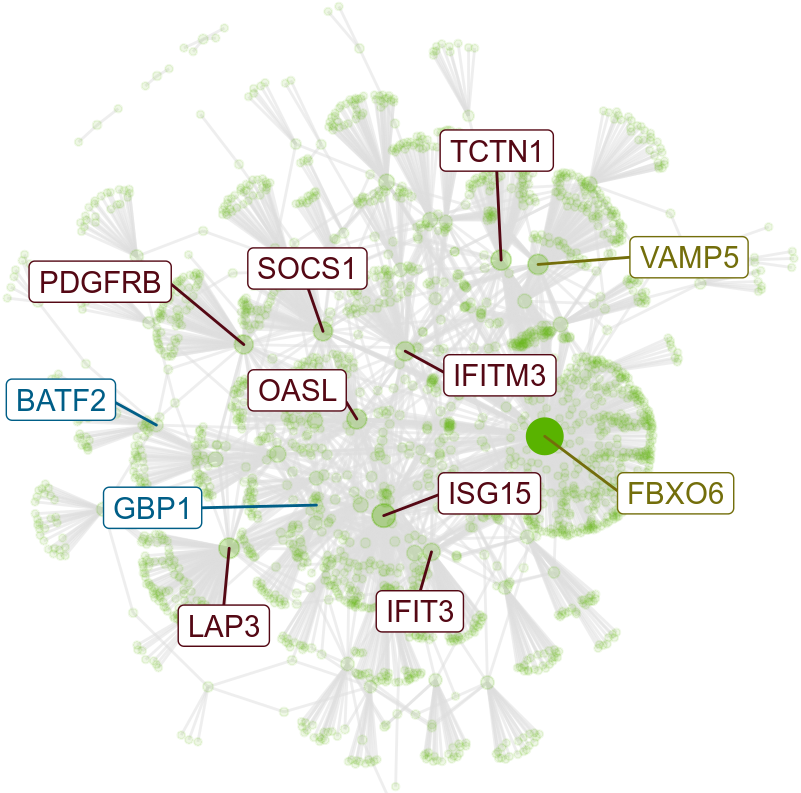

Hub

- a Co-expression
- a Co-expression + Interaction
- a Interaction

Degree

- 200
- 400
- 600

M6

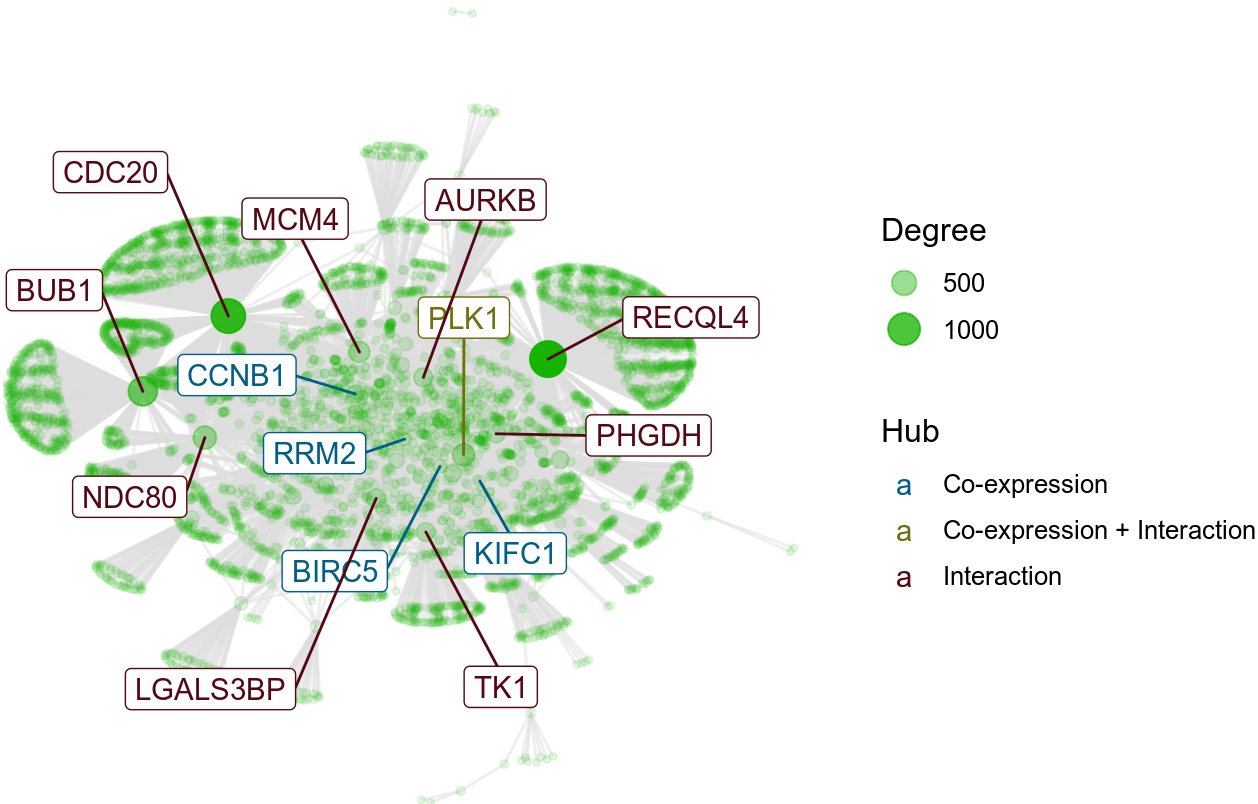



M7

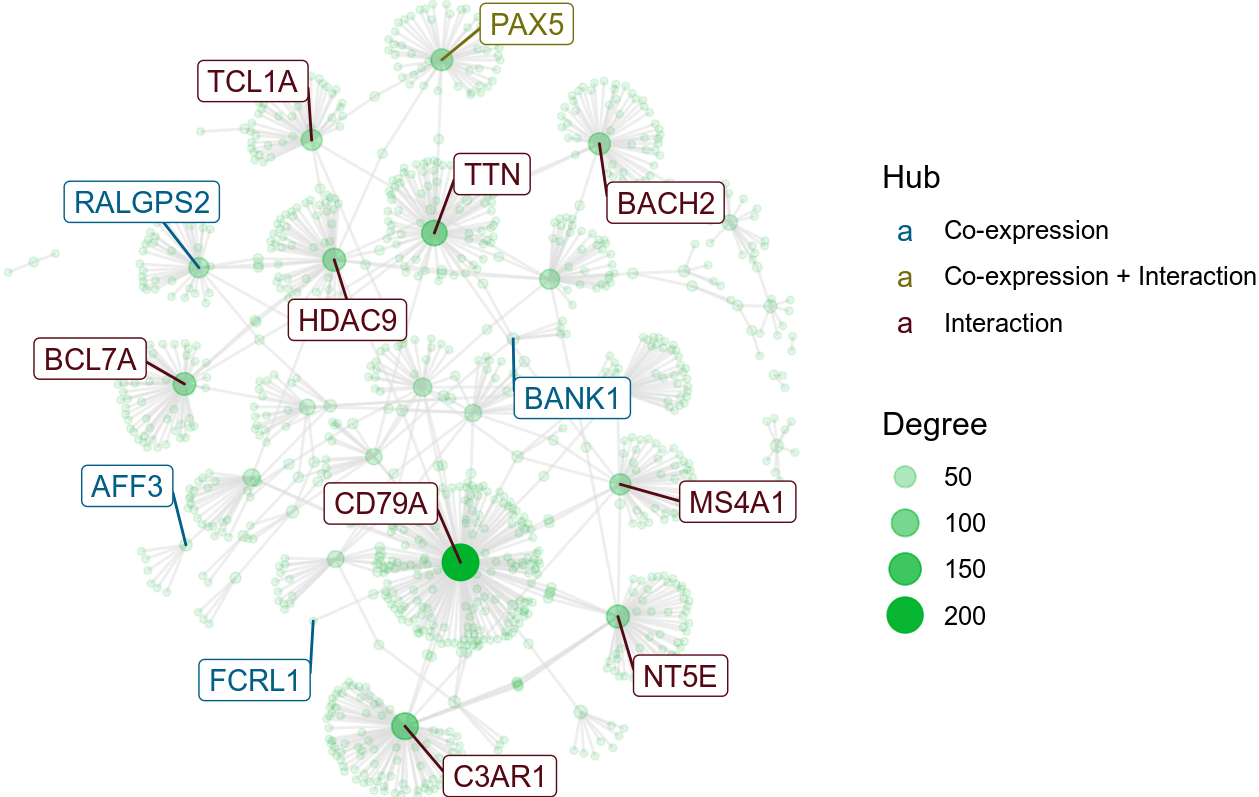

M8

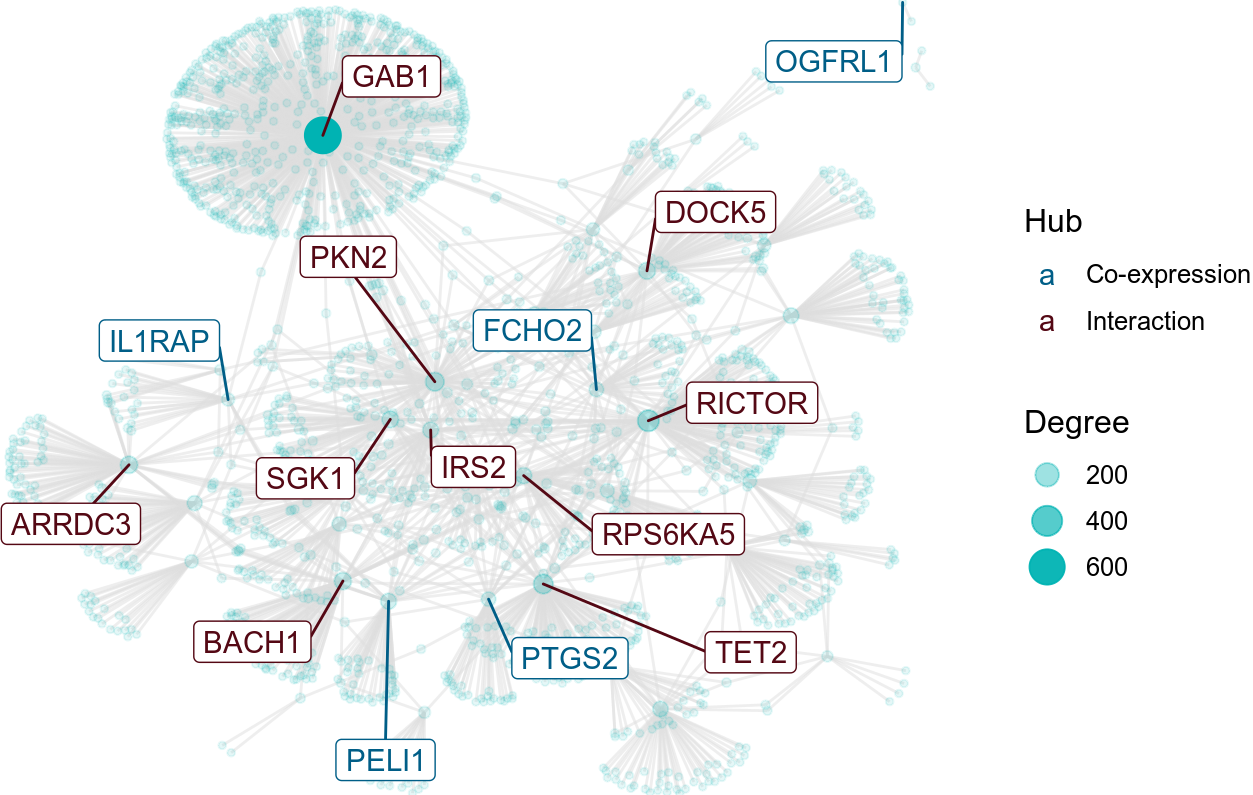

M9

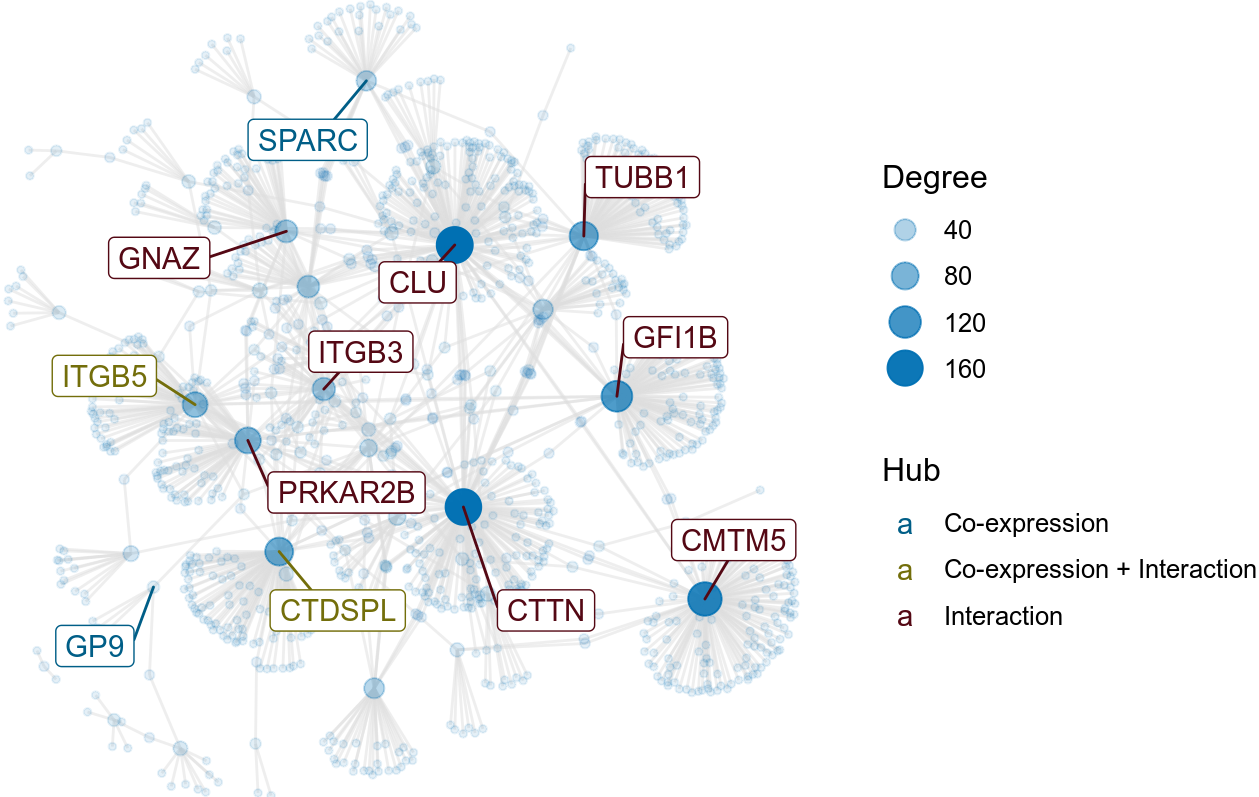

M10

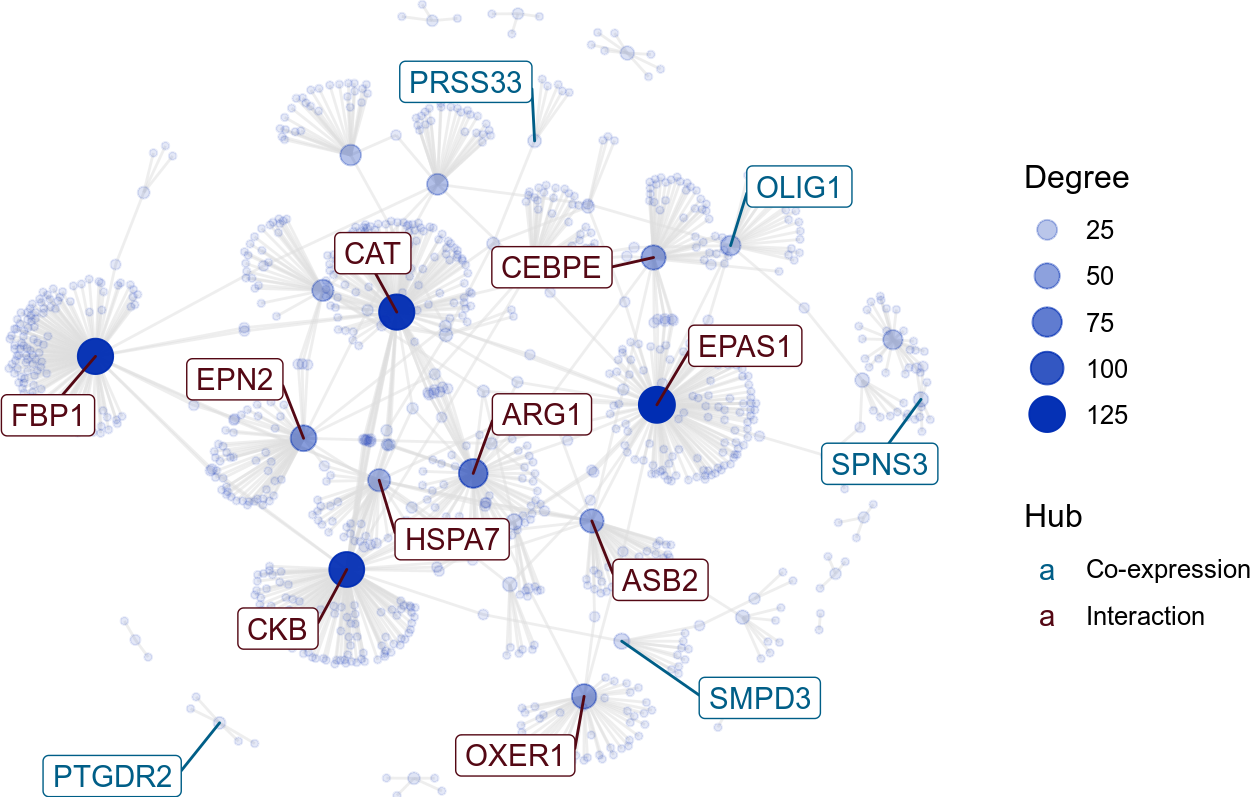

M11

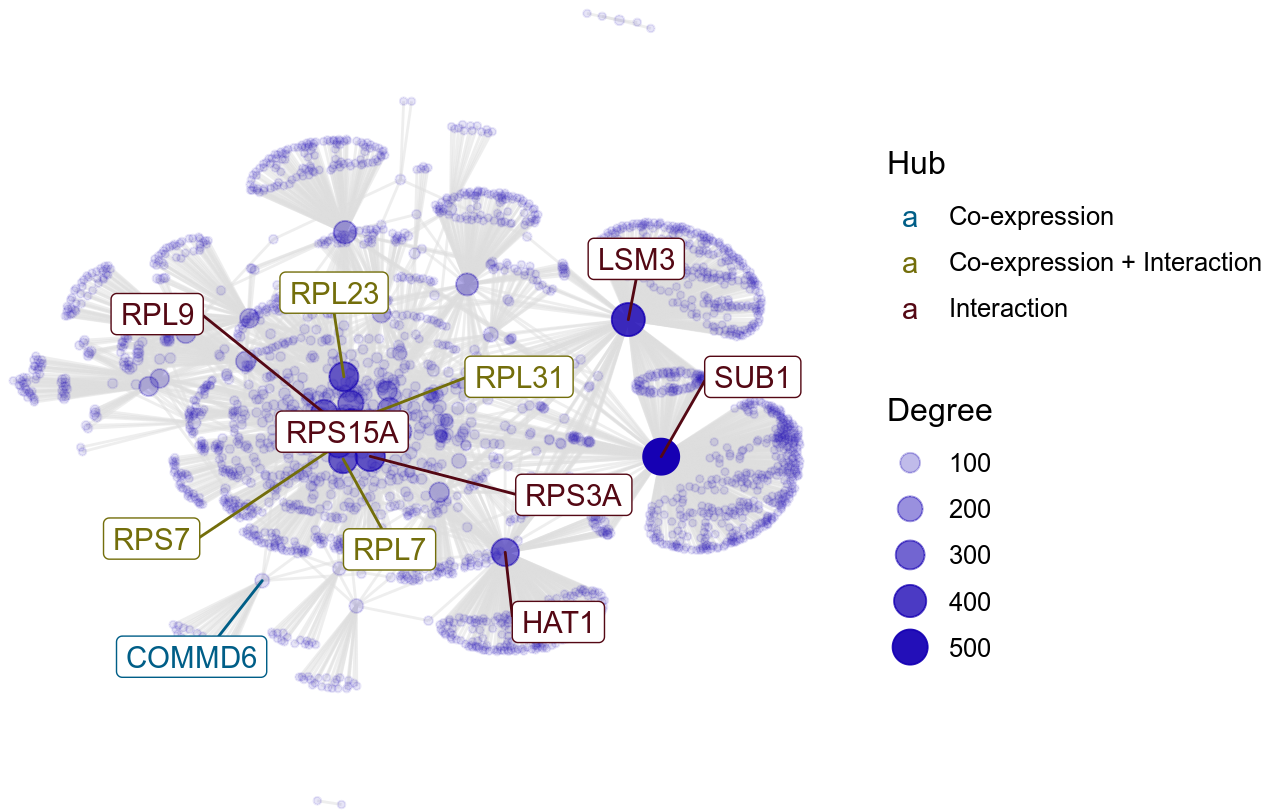

Parameters
